# Supplementary material for: Determinants of Health-Related Quality of life among patients with Acute Coronary Syndromes: A systematic review
Source: Research Square preprint supplement (doi:10.21203/rs.3.rs-8829483/v1), 2026-02-10
Supplement: Supplementary file 1 [file 0d0c7b64628b2e8557694d43.docx]

Supplementary material for a manuscript

**Determinants of Health-Related Quality of life among patients with Acute Coronary Syndromes: A systematic review**

In

**Quality of Life Research**

Panagiota Pelekaa*, Olympia Konstantakopouloua, Aglaia Katsiroumpaa, Maria Katharakia, Olga Siskoub, Daphne Kaitelidoua, Petros Galanisa

a National and Kapodistrian University of Athens, Department of Nursing, Athens, Greece

b University of Piraeus, Department of Tourism Studies, Athens, Greece

* Corresponding author:

[gpeleka@nurs.uoa.gr](mailto:gpeleka@nurs.uoa.gr)

Supplementary Table S1a. Quality assessment of the cross-sectional studies included in this systematic review.

|  | **Reference** | **Were the criteria for inclusion in the sample clearly defined?** | **Were the study subjects and the setting described in detail?** | **Was the exposure measured in a valid and reliable way?** | **Were objective, standard criteria used for measurement of the condition?** | **Were confounding factors identified?** | **Were strategies to deal with confounding factors stated?** | **Were the outcomes measured in a valid and reliable way?** | **Was appropriate statistical analysis used?** | **Risk of Bias** |
| --- | --- | --- | --- | --- | --- | --- | --- | --- | --- | --- |
| 1 | Radley et al., 2000 [1] | Yes | No | Yes | Yes | Yes | Yes | Yes | Yes | low |
| 2 | Brink et al., 2002 [2] | Yes | Yes | Yes | Yes | Yes | Yes | Yes | Yes | low |
| 3 | McBurney et al., 2002 [3] | Yes | Yes | Yes | Yes | Yes | Yes | Yes | Yes | low |
| 4 | de Jong-Watt & Sherifi, 2011 [4] | Yes | Yes | Yes | Yes | Yes | No | Yes | No | low |
| 5 | Panthee et al., 2011 [5] | Yes | Yes | Yes | Yes | Yes | Νο | Yes | Νο | low |
| 6 | Brink, 2012 [6] | Unclear | Yes | Yes | Yes | Yes | Yes | Yes | Yes | low |
| 7 | Sertoz et al., 2013 [7] | Yes | Yes | Yes | Yes | Yes | Yes | Yes | Yes | low |
| 8 | Mahesh et al., 2017 [8] | Yes | Yes | Yes | Yes | Yes | Yes | Yes | Yes | low |
| 9 | Wulandari et al., 2020 [9] | Yes | Yes | Yes | Yes | Yes | Yes | Yes | Yes | low |
| 10 | Kang et al., 2021 [10] | Yes | Yes | Yes | Yes | Yes | Yes | Yes | Yes | low |
| 11 | Džubur et al., 2022 [11] | Yes | Unclear | Yes | Yes | Yes | Yes | Yes | Yes | low |
| 12 | Rasmussen et al., 2022 [12] | Yes | Yes | Yes | Yes | Yes | Yes | Yes | Yes | low |
| 13 | Upadhyay et al., 2022 [13] | Yes | Yes | Yes | Yes | Yes | Yes | Yes | Yes | low |

Supplementary Table S1b. Quality assessment of the cohort studies included in this systematic review.

|  | **Reference** | **Were the two groups similar and recruited from the same population?** | **Were the exposures measured similarly to assign people to both exposed and unexposed groups?** | **Was the exposure measured in a valid and reliable way?** | **Were confounding factors identified?** | **Were strategies to deal with confounding factors stated?** | **Were the groups/ participants free of the outcome at the start of the study (or at the moment of exposure)?** | **Were the outcomes measured in a valid and reliable way?** | **Was the follow up time reported and sufficient to be long enough for outcomes to occur?** | **Was follow up complete, and if not, were the reasons to loss to follow up described and explored?** | **Were strategies to address incomplete follow up utilized?** | **Was appropriate statistical analysis used?** | **Risk of bias** |
| --- | --- | --- | --- | --- | --- | --- | --- | --- | --- | --- | --- | --- | --- |
| 1 | Bogg et al., 2000 [14] | Yes | Yes | Yes | Yes | Yes | Yes | Yes | Yes | Unclear | Unclear | Yes | low |
| 2 | Fritz, 2000 [15] | Yes | Yes | Yes | Yes | Yes | Yes | Yes | Yes | Yes | No | Yes | low |
| 3 | Lane et al., 2000 [16] | Yes | Yes | Yes | Yes | Yes | Yes | Yes | Yes | Yes | NA | Yes | low |
| 4 | Mayou et al., 2000 [17] | Yes | Yes | Yes | Yes | Yes | Yes | Yes | Yes | Yes | Yes | Yes | low |
| 5 | Beck et al., 2001 [18] | Yes | Yes | Yes | Yes | Yes | Yes | Yes | Yes | No | Yes | Yes | low |
| 6 | Lane et al., 2001 [19] | Yes | Yes | Yes | Yes | Yes | Yes | Yes | Yes | Yes | NA | Yes | low |
| 7 | Rumsfeld et al., 2001 [20] | Yes | Yes | Yes | Yes | Yes | Yes | Yes | Yes | No | No | Yes | low |
| 8 | Rumsfeld et al., 2003 [21] | Yes | Yes | Unclear | Yes | Yes | Yes | Yes | Yes | No | Yes | Yes | low |
| 9 | Bengtson et al., 2004 [22] | Yes | Yes | Yes | Yes | Yes | Yes | Yes | Yes | Yes | Yes | Yes | low |
| 10 | Brink et al., 2005 [23] | Yes | Yes | Yes | Yes | Yes | Yes | Yes | Yes | Yes | No | Yes | low |
| 11 | Fauerbach et al., 2005 [24] | Yes | Yes | Yes | Yes | Yes | Yes | Yes | Yes | Yes | No | Yes | low |
| 12 | Spertus et al., 2005 [25] | Yes | Yes | Yes | Yes | Yes | Yes | Yes | Yes | Yes | Yes | Yes | low |
| 13 | Dickens et al., 2006 [26] | Yes | Yes | Yes | Yes | Yes | Yes | Yes | Yes | Yes | Yes | Yes | low |
| 14 | de Jonge et al., 2006 [27] | Yes | Yes | Yes | Yes | Yes | Yes | Yes | Yes | Yes | Yes | Yes | low |
| 15 | Peterson et al., 2006 [28] | Yes | Yes | Yes | Yes | Yes | Yes | Yes | Yes | Yes | Yes | Yes | low |
| 16 | Failde & soto, 2006 [29] | Yes | Yes | Yes | Yes | Yes | Yes | Yes | Yes | No | Yes | Yes | low |
| 17 | Norris et al., 2007 [30] | Yes | Yes | Yes | Yes | Yes | Yes | Yes | Yes | Yes | Yes | Yes | low |
| 18 | Rahimi et al., 2007 [31] | Yes | Yes | Unclear | Yes | Yes | Yes | Yes | Yes | No | Yes | Yes | low |
| 19 | Ho et al., 2008 [32] | Yes | Yes | Yes | Yes | Yes | Yes | Yes | Yes | Yes | Yes | Yes | low |
| 20 | Thombs et al., 2008 [33] | Yes | Yes | Yes | Yes | Yes | Yes | Yes | Yes | Yes | Yes | Yes | low |
| 21 | Arnold et al., 2009 [34] | Yes | Yes | Yes | Yes | Yes | Yes | Yes | Yes | Yes | Yes | Yes | low |
| 22 | Bergman et al., 2009 [35] | Yes | Yes | Yes | Yes | Yes | Yes | Yes | No | Unclear | Unclear | Yes | low |
| 23 | Spertus et al., 2009 [36] | Yes | Yes | No | Yes | Yes | Yes | Yes | Yes | Yes | Yes | Yes | low |
| 24 | Arnold et al., 2009 [37] | Yes | Yes | Yes | Yes | Yes | Yes | Yes | Yes | Yes | Yes | Yes | low |
| 25 | Leifheit-Limson et al., 2010 [38] | Yes | Yes | Yes | Yes | Yes | Yes | Yes | Yes | Yes | Yes | Yes | low |
| 26 | Shin & Choi, 2010 [39] | Yes | Yes | Yes | Yes | Yes | Yes | Yes | No | No | Yes | Yes | low |
| 27 | Bucholz et al., 2011 [40] | Yes | Yes | Yes | Yes | Yes | Yes | Yes | Yes | Yes | Yes | Yes | low |
| 28 | Dueñas et al., 2011 [41] | Yes | Yes | Yes | Yes | Yes | Yes | Yes | Yes | Νο | Yes | Yes | low |
| 29 | Ginzburg & Ein-dor, 2011 [42] | Yes | Yes | Yes | Yes | Yes | Yes | Yes | Yes | Yes | Yes | Yes | low |
| 30 | Brink et al., 2012 [43] | Yes | Yes | Yes | Yes | Yes | Yes | Yes | Yes | No | No | Yes | low |
| 31 | Leifheit-Limson et al., 2012 [44] | Yes | Yes | Yes | Yes | Yes | Yes | Yes | Yes | Yes | Yes | Yes | low |
| 32 | Williams et al., 2012 [45] | Yes | Yes | Yes | Yes | Yes | Yes | Yes | Yes | Yes | No | Yes | low |
| 33 | Hosseini et al., 2014 [46] | Yes | Yes | Yes | Yes | Yes | Yes | Yes | Yes | Yes | Yes | Yes | low |
| 34 | Bennett et al., 2015 [47] | Yes | Yes | Yes | Yes | Yes | Yes | Yes | Yes | Yes | Yes | Yes | low |
| 35 | Salazar et al., 2016 [48] | Yes | Yes | Yes | Yes | Yes | Yes | Yes | Yes | Yes | Yes | Yes | low |
| 36 | Dzubur et al., 2016 [49] | Yes | Yes | Yes | Yes | Yes | Yes | Yes | Yes | Yes | NA | Yes | low |
| 37 | Kang et al., 2018 [50] | Yes | Yes | Yes | Yes | Yes | Yes | Yes | Yes | Yes | Yes | Yes | low |
| 38 | Xia et al., 2019 [51] | Yes | Yes | Yes | Yes | Yes | Yes | Yes | Yes | No | No | Yes | low |
| 39 | Jlassi et al., 2023 [52] | Yes | Yes | Yes | Yes | Yes | Yes | Yes | No | Yes | Να | Yes | low |
| 40 | Sauletzhanovna et al., 2024 [53] | Yes | Yes | Yes | Yes | Yes | Yes | Yes | Yes | Unclear | Yes | Yes | low |
| 41 | Füller et al., 2025 [54] | Yes | Yes | Yes | No | No | Yes | Yes | Yes | Yes | No | Yes | low |
| 42 | Malm et al., 2025 [55] | Yes | Yes | Yes | Yes | Yes | Yes | Yes | Yes | Yes | Yes | Yes | low |

**References**

1. Radley, A., Grove, A., Wright, S., & Thurston, H. (2000). Gender-role identity after heart attack: Links with sex and subjective health status. *Psychology & Health*, *15*(1), 123–133. https://doi.org/10.1080/08870440008400293

2. Brink, E., Karlson, B. W., & Hallberg, L. R.-M. (2002). Health experiences of first-time myocardial infarction: Factors influencing women’s and men’s health-related quality of life after five months. *Psychology, Health & Medicine*, *7*(1), 5–16. https://doi.org/10.1080/13548500120101522

3. McBurney, C. R., Eagle, K. A., Kline‐Rogers, E. M., Cooper, J. V., Mani, O. C. M., Smith, D. E., & Erickson, S. R. (2002). Health‐Related Quality of Life in Patients 7 Months After a Myocardial Infarction: Factors Affecting the Short Form‐12. *Pharmacotherapy: The Journal of Human Pharmacology and Drug Therapy*, *22*(12), 1616–1622. https://doi.org/10.1592/phco.22.17.1616.34121

4. de Jong-Watt, W., & Sheriﬁ, I. (2011). Patient-Centred Assessment of Social Support, Health Status and Quality of Life in Patients with Acute Coronary Syndrome, *21*(2).

5. Panthee, B., Kritpracha, C., & Chinnawong, T. (2011). Correlation between Coping Strategies and Quality of Life among Myocardial Infarction Patients in Nepal. https://doi.org/10.14710/nmjn.v1i2.976

6. Brink, E. (2012). Considering Both Health-Promoting and Illness-Related Factors in Assessment of Health-Related Quality of Life After Myocardial Infarction. https://doi.org/10.2174/1874434601206010090

7. Sertoz, O. O., Aydemir, O., Gulpek, D., Elbi, H., Ozenli, Y., Yilmaz, A., Ozan, E., Atesci, F., Abay, E., Semiz, M., Direk, N., Hocaoglu, C., Elyas, Z., Ozmen, M., Ozen, S., & Konuk, N. (2013). The Impact of Physical and Psychological Comorbid Conditions on the Quality of Life of Patients with Acute Myocardial Infarction: A Multi-Center, Cross-Sectional Observational Study from Turkey. *The International Journal of Psychiatry in Medicine*, *45*(2), 97–109. https://doi.org/10.2190/PM.45.2.a

8. Mahesh, P. K. B., Gunathunga, M. W., Jayasinghe, S., Arnold, S. M., Haniffa, R., & De Silva, A. P. (2017). Pre-event quality of life and its influence on the post-event quality of life among patients with ST elevation and non-ST elevation myocardial infarctions of a premier province of Sri Lanka. *Health and Quality of Life Outcomes*, *15*(1), 154. https://doi.org/10.1186/s12955-017-0730-9

9. Wulandari, D., Ginanjar, A. S., Purwono, U., & Purba, D. (2020). Marital Satisfaction, Anxiety, and Health-Related Quality of Life in Myocardial Infarction Patients, *12*(02).

10. Kang, K., Gholizadeh, L., & Han, H.-R. (2021). Health-related Quality of Life and Its Predictors in Korean Patients with Myocardial Infarction in the Acute Phase. *Clinical Nursing Research*, *30*(2), 161–170. https://doi.org/10.1177/1054773819894692

11. Džubur, A., Lisica, D., Hodžić, E., Begić, E., Lepara, O., Fajkić, A., Gogić, E., & Ejubović, M. (2022). Relationship between depression and quality of life after myocardial infarction. *Medicinski Glasnik*, *19*(1), 0–0. https://doi.org/10.17392/1404-21

12. Rasmussen, A. A., Fridlund, B., Nielsen, K., Rasmussen, T. B., Thrysoee, L., Borregaard, B., Thorup, C. B., Berg, S. K., & Mols, R. E. (2022). Gender differences in patient-reported outcomes in patients with acute myocardial infarction. *European Journal of Cardiovascular Nursing*, *21*(8), 772–781. https://doi.org/10.1093/eurjcn/zvac022

13. Upadhyay, V., Bhandari, S. S., Rai, D. P., Dutta, S., García-Grau, P., & Vaddiparti, K. (2022). Improving depression and perceived social support enhances overall quality of life among myocardial infarction survivors: necessity for integrating mental health care into cardiac rehabilitation programs. *The Egyptian Journal of Neurology, Psychiatry and Neurosurgery*, *58*(1), 87. https://doi.org/10.1186/s41983-022-00521-6

14. Bogg, J., Thornton, E., & Bundred, P. (2000). Gender variability in mood, quality of life and coping following primary myocardial infarction. *Coronary Health Care*, *4*(4), 163–168. https://doi.org/10.1054/chec.2000.0095

15. Fritz, H. L. (2000). Gender-Linked Personality Traits Predict Mental Health and Functional Status Following a First Coronary Event. https://doi.org/10.1037/0278-6133.19.5.420

16. Lane, D., Carroll, D., Ring, C., Beevers, D. G., & Lip, G. Y. H. (2000). Effects of depression and anxiety on mortality and quality-of-life 4 months after myocardial infarction. *Journal of Psychosomatic Research*, *49*(4), 229–238. https://doi.org/10.1016/S0022-3999(00)00170-7

17. Mayou, R. A., Gill, D., Thompson, D. R., Day, A., Hicks, N., Volmink, J., & Neil, A. (2000). Depression and Anxiety As Predictors of Outcome After Myocardial Infarction: *Psychosomatic Medicine*, *62*(2), 212–219. https://doi.org/10.1097/00006842-200003000-00011

18. Beck, C. A., Joseph, L., Bélisle, P., & Pilote, L. (2001). Predictors of quality of life 6 months and 1 year after acute myocardial infarction. *American Heart Journal*, *142*(2), 271–279. https://doi.org/10.1067/mhj.2001.116758

19. Lane, D., Carroll, D., Ring, C., Beevers, D. G., & Lip, G. Y. H. (2001). Mortality and Quality of Life 12 Months After Myocardial Infarction: Effects of Depression and Anxiety: *Psychosomatic Medicine*, *63*(2), 221–230. https://doi.org/10.1097/00006842-200103000-00005

20. Rumsfeld, J. S., Magid, D. J., Plomondon, M. E., O’Brien, M. M., Spertus, J. A., Every, N. R., & Sales, A. E. (2001). Predictors of quality of life following acute coronary syndromes. *The American Journal of Cardiology*, *88*(7), 781–784. https://doi.org/10.1016/S0002-9149(01)01852-5

21. Rumsfeld, J. S., Magid, D. J., Plomondon, M. E., Sales, A. E., Grunwald, G. K., Every, N. R., & Spertus, J. A. (2003). History of depression, angina, and quality of life after acute coronary syndromes. *American Heart Journal*, *145*(3), 493–499. https://doi.org/10.1067/mhj.2003.177

22. Bengtsson, I., Hagman, M., Währborg, P., & Wedel, H. (2004). Lasting impact on health-related quality of life after a first myocardial infarction. *International Journal of Cardiology*, *97*(3), 509–516. https://doi.org/10.1016/j.ijcard.2003.12.011

23. Brink, E., Grankvist, G., Karlson, B. W., & Hallberg, L. R.-M. (2005). Health-related quality of life in women and men one year after acute myocardial infarction. *Quality of Life Research*, *14*(3), 749–757. https://doi.org/10.1007/s11136-004-0785-z

24. Fauerbach, J. A., Bush, D. E., Thombs, B. D., McCann, U. D., Fogel, J., & Ziegelstein, R. C. (2005). Depression Following Acute Myocardial Infarction: A Prospective Relationship With Ongoing Health and Function. *Psychosomatics*, *46*(4), 355–361. https://doi.org/10.1176/appi.psy.46.4.355

25. Spertus, J., Safley, D., Garg, M., Jones, P., & Peterson, E. D. (2005). The Influence of Race on Health Status Outcomes One Year After an Acute Coronary Syndrome. *Journal of the American College of Cardiology*, *46*(10), 1838–1844. https://doi.org/10.1016/j.jacc.2005.05.092

26. Dickens, C. M., McGowan, L., Percival, C., Tomenson, B., Cotter, L., Heagerty, A., & Creed, F. H. (2006). Contribution of depression and anxiety to impaired health-related quality of life following first myocardial infarction. *British Journal of Psychiatry*, *189*(4), 367–372. https://doi.org/10.1192/bjp.bp.105.018234

27. De Jonge, P., Spijkerman, T. A., Van Den Brink, R. H. S., & Ormel, J. (2006). Depression after myocardial infarction is a risk factor for declining health related quality of life and increased disability and cardiac complaints at 12 months. *Heart*, *92*(1), 32–39. https://doi.org/10.1136/hrt.2004.059451

28. Peterson, P. N., Spertus, J. A., Magid, D. J., Masoudi, F. A., Reid, K., Hamman, R. F., & Rumsfeld, J. S. (2006). The impact of diabetes on one-year health status outcomes following acute coronary syndromes. *BMC Cardiovascular Disorders*, *6*(1), 41. https://doi.org/10.1186/1471-2261-6-41

29. Failde, I. I., & Soto, M. M. (2006). Changes in health related quality of life 3 months after an acute coronary syndrome. *BMC Public Health*, *6*(1), 18. https://doi.org/10.1186/1471-2458-6-18

30. Norris, C. M., Hegadoren, K., & Pilote, L. (2007). Depression Symptoms have a Greater Impact on the 1-Year Health-Related Quality of Life Outcomes of Women Post-Myocardial Infarction Compared to Men. *European Journal of Cardiovascular Nursing*, *6*(2), 92–98. https://doi.org/10.1016/j.ejcnurse.2006.05.003

31. Rahimi, A. R., Spertus, J. A., Reid, K. J., Bernheim, S. M., & Krumholz, H. M. (2007). Financial Barriers to Health Care and Outcomes After Acute Myocardial Infarction. *JAMA*, *297*(10), 1063. https://doi.org/10.1001/jama.297.10.1063

32. Ho, P. M., Eng, M. H., Rumsfeld, J. S., Spertus, J. A., Peterson, P. N., Jones, P. G., Peterson, E. D., Alexander, K. P., Havranek, E. P., Krumholz, H. M., & Masoudi, F. A. (2008). The influence of age on health status outcomes after acute myocardial infarction. *American Heart Journal*, *155*(5), 855–861. https://doi.org/10.1016/j.ahj.2007.11.032

33. Thombs, B. D., Ziegelstein, R. C., Stewart, D. E., Abbey, S. E., Parakh, K., & Grace, S. L. (2008). Usefulness of Persistent Symptoms of Depression to Predict Physical Health Status 12 Months After an Acute Coronary Syndrome. *The American Journal of Cardiology*, *101*(1), 15–19. https://doi.org/10.1016/j.amjcard.2007.07.043

34. Arnold, S. V., Alexander, K. P., Masoudi, F. A., Ho, P. M., Xiao, L., & Spertus, J. A. (2009). The Effect of Age on Functional and Mortality Outcomes After Acute Myocardial Infarction. *Journal of the American Geriatrics Society*, *57*(2), 209–217. https://doi.org/10.1111/j.1532-5415.2008.02106.x

35. Bergman, E., Malm, D., Karlsson, J.-E., & Berterö, C. (2009). Longitudinal study of patients after myocardial infarction: Sense of coherence, quality of life, and symptoms. *Heart & Lung*, *38*(2), 129–140. https://doi.org/10.1016/j.hrtlng.2008.05.007

36. Spertus, J. A., Jones, P. G., Masoudi, F. A., Rumsfeld, J. S., & Krumholz, H. M. (2009). Factors Associated With Racial Differences in Myocardial Infarction Outcomes. *Annals of Internal Medicine*, *150*(5), 314–324. https://doi.org/10.7326/0003-4819-150-5-200903030-00007

37. Arnold, S. V., Spertus, J. A., Jones, P. G., Xiao, L., & Cohen, D. J. (2009). The impact of dyspnea on health-related quality of life in patients with coronary artery disease: Results from the PREMIER registry. *American Heart Journal*, *157*(6), 1042-1049.e1. https://doi.org/10.1016/j.ahj.2009.03.021

38. Leifheit-Limson, E. C., Reid, K. J., Kasl, S. V., Lin, H., Jones, P. G., Buchanan, D. M., Parashar, S., Peterson, P. N., Spertus, J. A., & Lichtman, J. H. (2010). The Role of Social Support in Health Status and Depressive Symptoms After Acute Myocardial Infarction: Evidence for a Stronger Relationship Among Women. *Circulation: Cardiovascular Quality and Outcomes*, *3*(2), 143–150. https://doi.org/10.1161/CIRCOUTCOMES.109.899815

39. Shin, N.-M., & Choi, J. (2010). Relationship Between Survivors’ Perceived Health Status Following Acute Coronary Syndrome and Depression Symptoms During Early Recovery Phase. *Asian Nursing Research*, *4*(4), 174–184. https://doi.org/10.1016/S1976-1317(11)60002-9

40. Bucholz, E. M., Rathore, S. S., Gosch, K., Schoenfeld, A., Jones, P. G., Buchanan, D. M., Spertus, J. A., & Krumholz, H. M. (2011). Effect of Living Alone on Patient Outcomes After Hospitalization for Acute Myocardial Infarction. *The American Journal of Cardiology*, *108*(7), 943–948. https://doi.org/10.1016/j.amjcard.2011.05.023

41. Dueñas, M., Ramirez, C., Arana, R., & Failde, I. (2011). Gender differences and determinants of health related quality of life in coronary patients: a follow-up study. *BMC Cardiovascular Disorders*, *11*(1), 24. https://doi.org/10.1186/1471-2261-11-24

42. Ginzburg, K., & Ein-Dor, T. (2011). Posttraumatic stress syndromes and health-related quality of life following myocardial infarction: 8-year follow-up. *General Hospital Psychiatry*, *33*(6), 565–571. https://doi.org/10.1016/j.genhosppsych.2011.08.015

43. Brink, E., Alsén, P., Herlitz, J., Kjellgren, K., & Cliffordson, C. (2012). General self-efficacy and health-related quality of life after myocardial infarction. *Psychology, Health & Medicine*, *17*(3), 346–355. https://doi.org/10.1080/13548506.2011.608807

44. Leifheit-Limson, E. C., Reid, K. J., Kasl, S. V., Lin, H., Buchanan, D. M., Jones, P. G., Peterson, P. N., Parashar, S., Spertus, J. A., & Lichtman, J. H. (2012). Changes in social support within the early recovery period and outcomes after acute myocardial infarction. *Journal of Psychosomatic Research*, *73*(1), 35–41. https://doi.org/10.1016/j.jpsychores.2012.04.006

45. Williams, L., O’Connor, R. C., Grubb, N. R., & O’Carroll, R. E. (2012). Type D personality and three-month psychosocial outcomes among patients post-myocardial infarction. *Journal of Psychosomatic Research*, *72*(6), 422–426. https://doi.org/10.1016/j.jpsychores.2012.02.007

46. Hosseini, S. H., Ghaemian, A., Mehdizadeh, E., & Ashraf, H. (2014). Contribution of depression and anxiety to impaired quality of life in survivors of myocardial infarction. *International Journal of Psychiatry in Clinical Practice*, *18*(3), 175–181. https://doi.org/10.3109/13651501.2014.940049

47. Bennett, K. K., Buchanan, D. M., Jones, P. G., & Spertus, J. A. (2015). Socioeconomic status, cognitive-emotional factors, and health status following myocardial infarction: testing the Reserve Capacity Model. *Journal of Behavioral Medicine*, *38*(1), 110–121. https://doi.org/10.1007/s10865-014-9583-4

48. Salazar, A., Dueñas, M., Fernandez-Palacin, F., & Failde, I. (2016). Factors related to the evolution of Health Related Quality of Life in coronary patients. A longitudinal approach using Weighted Generalized Estimating Equations with missing data. *International Journal of Cardiology*, *223*, 940–946. https://doi.org/10.1016/j.ijcard.2016.08.300

49. Dzubur, A., Mekic, M., Pesto, S., & Nabil, N. (2016). Echocardiographic Parameters as Life Quality Predictors in Patients After Myocardial Infarction Treated with Different Methods. *Medical Archives*, *70*(6), 419. https://doi.org/10.5455/medarh.2016.70.419-424

50. Kang, K., Gholizadeh, L., Han, H.-R., & Inglis, S. C. (2018). Predictors of health-related quality of life in korean patients with myocardial infarction: a longitudinal observational study. *Heart & Lung*, *47*(2), 142–148. https://doi.org/10.1016/j.hrtlng.2017.12.005

51. Xia, K., Wang, L.-F., Yang, X.-C., Jiang, H.-Y., Zhang, L.-J., Yao, D.-K., Hu, D.-Y., & Ding, R.-J. (2019). Comparing the effects of depression, anxiety, and comorbidity on quality-of-life, adverse outcomes, and medical expenditure in Chinese patients with acute coronary syndrome. *Chinese Medical Journal*, *132*(9), 1045–1052. https://doi.org/10.1097/CM9.0000000000000215

52. Jlassi, O., Omrane, A., Ben Massoud, M., Khalfallah, T., Bouzgarrou, L., & Gamra, H. (2024). Determinants of health-related quality of life among patients with Ischemic heart disease. *Health Systems*, *13*(4), 322–331. https://doi.org/10.1080/20476965.2023.2275799

53. Sauletzhanovna, T. A., Mohammed, W. K., Ahmed, A. S., Mohammed, H. I., Al-Hili, A., Alnajar, M. J., Naser, N. S., Amr, E. F., & Mohsin, R. M. (2024). The Predictive Value of Depression and Anxiety on Protracted Cardiovascular Outcomes in Individuals with Acute Myocardial Infarction. *International Journal of Body, Mind and Culture*, (Vol 11, No(Special Issue) 2024), 64–75. https://doi.org/10.22122/ijbmc.v11isp.739

54. Füller, D., Andresen-Bundus, H., Pagonas, N., Jaehn, P., Ukena, C., Gödde, K., Holmberg, C., Ritter, O., & Sasko, B. (2025). Adverse socioeconomic factors are associated with a widening gap in one-year health-related quality of life after acute myocardial infarction. *Scientific Reports*, *15*(1), 19791. https://doi.org/10.1038/s41598-025-04604-1

55. Malm, D., Mårtensson, J., & Årestedt, K. (2025). Sense of coherence and quality of life in the recovery of women and men with myocardial infarction: a 10-year follow-up study. *European Journal of Cardiovascular Nursing*, *24*(4), 631–639. https://doi.org/10.1093/eurjcn/zvaf028
