# Supplementary material for: Determinants of Health-Related Quality of life among patients with Acute Coronary Syndromes: A systematic review
Source: Research Square preprint supplement (doi:10.21203/rs.3.rs-8829483/v1), 2026-02-10
Supplement: Supplementary file 2 [file 8df34b50b23ab18c4aa9191a.docx]

Supplementary material for a manuscript

**Determinants of Health-Related Quality of life among patients with Acute Coronary Syndromes: A systematic review**

In

**Quality of Life Research**

Panagiota Pelekaa*, Olympia Konstantakopouloua, Aglaia Katsiroumpaa, Maria Katharakia, Olga Siskoub, Daphne Kaitelidoua, Petros Galanisa

a National and Kapodistrian University of Athens, Department of Nursing, Athens, Greece

b University of Piraeus, Department of Tourism Studies, Athens, Greece

* Corresponding author:

[gpeleka@nurs.uoa.gr](mailto:gpeleka@nurs.uoa.gr)

**Supplementary Table S3.** Relationships between determinants and health-related quality of life among patients with acute coronary syndromes.

|  | **Reference** | **Relationships** |
| --- | --- | --- |
| **1** | Bogg et al., 2000 [1] | - Females: ↓ emotional quality of life one (T=3.27), three (T=3.35) and six months (T=2.26) after AMI. (p< 0.01 or better)   ♂ Predictors of QOL 6 months post MI   - Emotion focused coping: ↑ social QOL (b= 0.49 p< 0.001) - Depression at one month: ↓ physical QOL (b= 0.89, p< 0.001) - Absence of Anxiety at baseline: ↑ Emotional QOL (b=0.89, p< 0.001) - Absence of Anxiety at 1 month: ↑ Emotional QOL (b=0.76, p< 0.001) - Negative mood at 1-month: ↓ Emotional QOL (b=0.69, p< 0.001) - Emotion focused coping: ↑ Emotional QOL (b=0.67, p< 0.001) - Not using Avoidance coping: ↑ Emotional QOL (b=0.52, p< 0.001)   ♀ Predictors of QOL 6 months post MI   - Task oriented coping: ↑ social QOL (b= 0.63, p< 0.001) - Depression at baseline: ↓ social QOL (b= 0.92, p< 0.001) - Depression at one-month: ↓ social QOL (b= 0.76, p< 0.001) - Depression at baseline: ↓ Physical QOL (b=0.52, p< 0.001) - Negative mood at one month: ↓ Physical QOL (b=0.46, p< 0.001) - Emotion focused coping: ↑ Emotional QOL (b= 0.49, p< 0.001) - Negative mood at one month: ↓ Emotional QOL (b= 0.63, p< 0.001) |
| **2** | Fritz, 2000 [2] | - Females: ↓ baseline physical functioning (t= 3.39, p < .001) - Older patients: ↑mental functioning at baseline (r = 0.31, p < .05) and had better improvements in mental functioning 4 months after (r= 0.25, p < .05) - At baseline, agency: ↑physical functioning (r= 0.28, p< 0.05.) - Unmitigated communion: ↓ mental functioning (r= -0.29 p< 0.05.) - Agency: ↑ mental functioning over time (b=0.3, p<0.05) |
| **3** | Lane et al., 2000 [3] | - Male gender: ↑ HRQOL (r=0.31, p<0,05). - Having a partner: ↑ HRQOL (b=0.22, B=3.01, 95% CΙ for B= 1.23-4.79, p= 0.002). - Not living alone: ↑ HRQOL (r=0.2, p<0.05), - Being employed: ↑ HRQOL (r=0.18, p<0.05). - Higher Peel Index score: ↓ HRQOL (b= 0.24, B= 0.3, 95% CΙ for B= 0.14-0.47, p=0.001) - The longer the hospital stay: ↓ HRQOL (r=0.15, p<0.04). - Higher frequency (r=-0.21, p< 0.003) and higher duration of previous exercise behavior (r=-0.17, p=0.02): ↑ HRQOL. - High anxiety scores: ↓ HRQOL (b= 0.18, B=0.09, 95% CΙ for B=0.02-0.17, p= 0.02). - Depressed patients: ↓ HRQOL (b=0.2, B=0.21, 95% CΙ for B= 0.05-0.37, p= 0.0001). |
| **4** | Mayou et al., 2000 [4] | - Combined anxiety and depression (distressed patients) at baseline: ↓ HRQOL both 3 months and 1 year on all dimensions of the SF-36 than non-distressed patients (p<0.05) |
| **5** | Radley et al., 2000 [5] | - Higher levels of masculinity: ↑ health status for both women and men. (B=5.51, SE B=2.00, b=0.32, p < 0.05). - Females: ↓ self-reported general health status (t = -2.12, p < 0.05). - More cardiac symptoms: ↓QOL (B=-6.01, SE B=1.21, b=-0.40, p < 0.05). - More comorbid illnesses: ↓QOL (B=-6.8, SE B=3.39, b=-0.16, p < 0.05). |
| **6** | Beck et al., 2001 [6] | 6 months:   - ↑ QOL score at baseline: ↑ PCS, MCS, and EuroQol scores (b= 3.6, 2.4, 2.0 [per 10-point difference in QOL score at baseline], 95% CΙs= 2.7-4.5, 1.3-3.4, 1.2-2.8, respectively). - ↑ BDI score: ↓physical, mental, and overall QOL (b= –1.6, –3.7, –5.4 [per 10-point difference in depression scores at baseline], 95% CΙs= –2.9 to –0.4, –5.3 to –2.2, –7.7 to –3.2, respectively) - Older age: ↓ PCS and EuroQol scores (b= –1.5 [per 10-year age difference], –2.7 [per 10-year age difference], 95% CΙs= –2.2 to –0.7, –4.2 to–1.1, respectively). - Previous bypass surgery: ↓PCS scores, (b= –5.6, 95% CIs= –9.9 to –1.3) - Shock sustained in-hospital: ↑PCS scores, (b=9.9, 95% CΙs-=3.4-16.4) - Creatine kinase level: ↓ MCS scores [b=–0.1 (per 100-unit difference), 95% CΙs= –0.2 to –0.03] - Being on sick leave at baseline: ↓ EuroQol scores (b= –23.8, 95% CIs –35.5 to–12.0) - Killip class I: ↑ PCS scores, (b=4.1, 95% CIs=1.2 to 7.0)   12 months:     - ↑ QOL scores at baseline: ↑in each outcome measure at 1 year (b= PCS 4.6, MCS 3.3, EUROQOL 2.2 [per 10-point difference in QOL score at baseline], 95% CΙs= 3.8-5.4, 2.3-4.2, 1.4-3, respectively). - Older age: ↓ PCS and EuroQol scores (b= –1.3, –2.5 [per 10-year age difference], 95% CΙs= –2.0 to –0.5, –3.7 to –1.2, respectively). - ↑BDI score at baseline: ↓ MCS scores at 1 year (b= –3 [per 10-point score difference], 95% CΙs= –4.5 to –1.5). - Previous bypass surgery: ↓in both PCS and EuroQol scores (b=–5.3, –12.5, 95% CΙs= –9.2 to –1.3, –19.7 to –5.3, respectively). - Male sex: ↑ PCS, (b= 3.6, 95% CIs=1.5 to 5.8), - At least one episode of acute mitral regurgitation, acute ventriculoseptal defect, or tamponade (↓ EuroQol) (b= –34.3, 95% CIs= –52.6 to –16.1), - Diabetes (↑EuroQol) (b= 6.7, 95% CIs= 2.6 to 11.3) |
| **7** | Lane et al., 2001 [7] | - Females: ↓ QOL (r=0.2, p<0.05). - Having a partner: ↑ QOL (r=0.22, p<0.05). - Not living alone: ↑ QOL (b= 3.79, 95% CI=1.91-5.66, p=0.001) - Being employed: ↑ QOL (r=0.18, p<0.05). - The higher the Peel Index score: ↓ QOL (b= 0.34. 95% CI=0.18-0.49, p=0.001). - The worse the Killip class designation: ↓ QOL (r=0.15/ p<0,05). - The longer the hospital stay: ↓ QOL (r=0.25, p<0.001). - Higher frequency of previous exercise behavior: ↑ QOL. (r=-0.18/ p=0.02) - High anxiety scores: ↓ QOL (b= 0.10, 95%CI= 0.03-0.18, p=0.008) - Depressed patients: ↓ QOL (b=0.21, 95%CI= 0.05-0.37, p=0.001). |
| **8** | Rumsfeld et al., 2001 [8] | Predictors of Seven-Month Physical Health Status   - History of arthritis: ↓ physical health status (b= -4.40, p=0.001) - Chronic obstructive pulmonary disease: ↓ physical health status (b= -3.67, p=0.001) - Prior coronary artery bypass grafting (CABG) surgery: ↓ physical health status (b=-3.46, p=0.001) - Congestive heart failure: ↓ physical health status (b= -3.42, p=0.001) - Stroke: ↓ physical health status (b=-3.08, p=0.001) - Diabetes: ↓ physical health status (b=-2.39, p=0.001) - Peptic ulcer disease: ↓ physical health status (b=-2.24, p=0.007) - Depression: ↓ physical health status (b=-1.71, p=0.003). - Elevated serum creatinine: ↓ physical health status (b=-0.73 p=0.002) - No stress test during the index ACS hospitalization: ↓ physical health status (b=-1.79, p=0.002) - Discharge diagnosis of unstable angina (as opposed to myocardial infarction): ↓ physical health status (b= -1.33, p=0.012) - Revascularization with either percutaneous coronary intervention or CABG surgery, either during the initial hospitalization (b=3.18, p=0.001) or in the post-discharge interim period (b= 2.04, p=0.003): ↑ physical health status - Non-Caucasian race: ↑ physical health status (b=2.03, p=0.02).   Predictors of Seven-Month Mental Health Status   - History of depression: ↓mental health status (b=-12.03, p=0.001) - Stroke: ↓mental health status (b=-2.40, p=0.008) - Revascularization with either percutaneous coronary intervention or CABG surgery during the index hospitalization: ↑ mental health status (b=1.41, p=0.040) - Older age: ↑ mental health status (b=0.08, p=0.002) |
| **9** | Brink et al., 2002 [9] | - Women: ↓ physical health. [PCS ♀ 36.8 (9.4), ♂ 41.8 (10.1), p <0.05] - Depression: ↓ PCS (b= -0.34, p< 0.01) - Coping strategy fatalism: ↓ PCS (b= -0.25, p<0.05) - Health complaints/symptoms: ↓ PCS (b=-0.52, p< 0.001.) - Coping strategy minimization: ↑MCS (b=0.27, p<0.01). - Depression: ↓MCS (b=-0,38, p<0,01) - Health complaints/symptoms: ↓MCS (b=-0.3, p<0,001) |
| **10** | McBurney et al., 2002 [10] | - Younger than 65 years: ↓MCS (b=0.22, p=0.001) - Lower overall compliance with drug therapy: ↓MCS (b=0.24, p=0.001) - Low compliance with lipid-lowering therapy: ↓MCS (b=0.20, p=0.003) - More comorbid diseases: ↓ PCS (b=-0.24 p=0.001) - History of Percutaneous Coronary Intervention: ↓ PCS (b=-0.15, p=0.02), - Chronic heart failure: ↓ PCS (b=-0.16, p=0.02), - Transient Ischemic Attack: ↓ PCS (b=-0.14, p=0.04) - Rehospitalization in the period after the index hospitalization: ↓ PCS (b=-0.24, p<0.001). |
| **11** | Rumsfeld et al., 2003 [11] | - History of depression: ↓ QOL (OR 2.84, 95% CI 2.16-3.72, p=0.001) |
| **12** | Bengtsson et al., 2004 [12] | - Age group <59 years: ↓ Emotional Functioning in the Cardiac Health Profile at two years (p=0.03). - Age group <59 years: ↓ Social Functioning in the Cardiac Health Profile at two years (p=0.05). - Age group <59 years: ↓ Social Functioning in the SF-36 (p=0.03). - No invasive intervention during follow-up: ↑ MCS scores (p<0.001). |
| **13** | Brink et al., 2005 [13] | - Females: ↓ PCS one year after AMI [♂ 44.6(10.3) VS ♀ 37.5(11.6) p<0.01].   ♀ Predictors   - Depression measured at 1 week after AMI: ↓ PCS at one year (r=-0.45, b=-0.27, p<0.01). - Depression at 5 months after AMI: ↓ PCS (r -0.49, b= -0.35, p<0.01). - Depression at 5 months: ↓MCS at the one-year follow-up (r=-0.59, b=-0.57, p<0.01). - Older age: ↓ PCS 1 year after MI (r= -0.42, b=-0.28, p<0.01). - Fatigue 5 months after MI: ↓ MCS 1 year after MI (r=-0.55, b=- 0.25, p<0.01).   ♂ Predictors   - Depression 5 months after MI: ↓ PCS (r=-0.46, b=-0.13, p<0.01). - Fatigue 5 months after MI: ↓ PCS (r=-0.69, b=-0.63, p<0.01). - Depression at 1 week after AMI: ↓ MCS 1 year after MI (r=-0.44, b=-0.29, p<0.01). - Older age: ↑ MCS 1 year after MI (r=0.27, b=0.27, p<0.05). - Depression 5 months after MI: ↓MCS 1 year after MI (r=-0.42, b=-0.09, p<0.01). - Fatigue 5 months after MI: ↓MCS 1 year after MI (r=-0.35, b=-0.24, p<0.01). |
| **14** | Fauerbach et al., 2005 [14] | - At baseline, depressed group: ↓ mean SF-36 mental domain score [42.7 (SD 11.0)] than non-depressed group [51.8, SD (6.2)] (t=7.0, p <0.01). - At baseline, depressed group: ↓ mean SF-36 physical domain score (mean 37.4, SD 10.4) than non-depressed group (mean 40.9, SD 9.6) (t 2.1, p=0.04). - At the follow-up evaluation: significant multivariate effect of depression on post MI in the mental domain (p<0.01). - Depressed patients at the baseline scored significantly lower than the non-depressed group at 4months on measures of global health (p< 0.01), mental health (p< 0.01), role interference by emotional problems (p<0.01), vitality (p<0.01) and social functioning (p<0.01). |
| **15** | Spertus et al., 2005 [15] | - At one year, blacks had ↓ QOL [SAQ score 70,6 (28.3) vs. 83.9 (20.8), p<0.0001] and ↓physical function than whites [(SF-12 PCS =36.8 (12.3) vs. 43.2 (11.4), p<0.0001]. - Multivariable models, revealed significantly lower QOL at one year for blacks (mean difference= -7.7 ±2.4, p=0.002) and lower physical function (mean difference=-3.6 ±1.3, p=0.005). |
| **16** | Dickens et al., 2006 [16] | - Older patients: ↓ QOL at the 12-month follow-up (b=-21, t=-3.47, p= 0.001) - ↑ physical QOL at baseline: ↑ physical QOL at 12 months (b=0.18, t=2.86, p=0.005) - Gastrointestinal problems: ↓ physical QOL (b=-0.12, t=-2.32, p=0.021) - Rheumatic disease: ↓ physical QOL (b=-0.15, t=-2.68, p<0.008) - Presence of other medical problems: ↓ physical QOL (b=-0.13, t=-2.39, p=0.018). - Current or past smokers: ↓ physical QOL (b=-0.15, t=2.77, p=0.006). - Infarction site categorized as "other" (as opposed to "anterior"): ↓ physical QOL (b=-0.1, t=-2.12, p=0.04). - Experience of further cardiac events (like another hospital admission for a cardiac problem) during the 12-month follow-up period: ↓ physical QOL (b=-0.12, t=-2.22, p=0.028) - Higher levels of depression at 6-months: ↓ physical QOL at 12 months (b=-0.21, t=-2.91, p=0.004) - Higher levels of anxiety at 6 months: ↓ physical QOL at 12 months (b=-0.15, t=-2.09, p= 0.037). - Participants depressed at 12 months: ↓ PCS scores than those who were not [mean scores= 32.7 (s.d.= 9.9) vs 43.8 (s.d=11.1) respectively, t=7.8, p<0.0005). - Patients who were employed at the time of MI: ↑ mean PCS at baseline [48.7 (s.e.m.= 0.86)] compared with for those on sick leave 31.8 (s.e.m.= 1.9) (p<0.0005). - For those who had returned to work at 12-month follow-up, the mean PCS at follow-up was higher [46.5 (s.e.m.=1.3)] than those who had not returned to work [39.5 (s.e.m.)=1.7], p<0.003. - The SF–36 PCS at 12 months was lower for depressed [30.9 (7.4)] than non-depressed [44.1 (10.7)] (t=8.8, p< 0.0005). |
| **17** | de Jonge et al., 2006 [17] | Physical functioning at 12 months   - Health status at 3 months: ↑Physical functioning [b (95% CI) =0.70 (0.63, 0.78)] - History of MI: ↓ Physical functioning [b (95% CI) = -6.32(-11.55, -1.10)] - Post MI depression: ↓ Physical functioning [b (95% CI) = -6.73(-11.08, -2.39)     Social functioning at 12 months   - Health status at 3 months: ↑ Social functioning [b (95% CI) = 0.47 (0.38, 0.55)] - Older age at MI: ↓ Social functioning [b (95% CI) = -0.17(-0.33, -0.01)] - Female sex: ↓ Social functioning [b (95% CI) = -5.30(-9.81, -0.80) - Post MI depression: ↓ Social functioning [b (95% CI) = -10.36 (-15.18, -5.53)]   Role limitations-physical at 12 months   - Health status at 3 months: ↑ Role limitations-physical [b (95% CI) = 0.44 (0.35, 0.52)] - Female sex: ↓ Role limitations-physical [b (95% CI) = -12.26 (-20.88, -3.63)] - Post MI depression: ↓ Role limitations-physical [b (95% CI) = -15.46 (-24.56, -6.36)]   Role limitations-emotional at 12 months   - Health status at 3 months: ↑ Role limitations-emotional [b (95% CI) = 0.37(0.29, 0.46)] - History of MI: ↓ Role limitations-emotional [b (95% CI) = -11.71 (-21.51, -1.90)] - Post MI depression: ↓ Role limitations-emotional [b (95% CI) = -20.44 (-29.04, -11.85)]   General health at 12 months   - Health status at 3 months: ↑ General health [b (95% CI) = 0.57 (0.49, 0.65)] - Post MI depression: ↓ General health [b (95% CI) = -6.43 (-10.67, -2.19)]   Pain at 12 months   - Health status at 3 months: ↑ scores in Pain Domain, which means less pain [b (95% CI) = 0.52 (0.43, 0.60)] - Post MI depression: ↓ scores in Pain Domain, which means more pain [b (95% CI) = -5.74 (-9.84, –1.65)] |
| **18** | Peterson et al., 2006 [18] | - Diabetes: ↓ mean SAQ scores for physical limitation at the time of the index hospitalization (p < 0.001) - Diabetes: ↓ SAQ physical limitation (p < 0.0001) and HRQoL (p < 0.0001) one year following ACS - Diabetes: ↑ odds of cardiac-related physical limitation (OR 1.94; 95% CI 1.57–3.24) and HRQoL deficits (OR 1.43; 95% CI 1.01–2.04) at one year. - Diabetes: ↓ PCS as measured by the SF-12. (b = 2.85 +/- 1.12, p = 0.01)   Predictors of physical limitation   - Female gender: (OR 1.65, 95% CI 1.19–2.28) - Caucasian race (OR 0.61, 95% CI 0.40–0.93) - History of MI (OR 1.61, 95% CI 1.15–2.24) - History of alcohol or substance abuse (OR 2.28, 95% CI 1.27–4.09) - Discharge prescription of an angiotensin converting enzyme inhibitor or an ARBs (OR 1.52, 95% CI 1.07–2.16) - Chronic lung disease (OR 2.15, 95% CI 1.15–4.00).   Predictors of HRQoL deficits   - Age (OR 1.28, 95% CI 1.14–1.45 per decade decrement) - Ejection fraction (OR 1.12 (1.01–1.27 per 10% decrease) - Acute thrombolytic therapy (OR 1.92; 95% CI 1.01–3.66) - Chronic lung disease (OR 2.36; 95% CI 1.33–4.20). |
| **19** | Failde & Soto, 2006 [19] | Multiple linear regression model for the change in PCS from baseline to follow up     - Revascularization performed during the follow-up: the decrease in the PCS at 3 months was 6.4 points less in those patients submitted to a revascularization (b= -6.497, p= 0.047) - Age: the decrease in the PCS at 3 months was 0.2 points less for each year of age (b=-0.259, p= 0.037) - Interaction between previous history of coronary heart disease (CHD) and the presence of one or more risk factors: a reduced decrease (4.7 points) at 3 months was found (b=-4.783, p=0.080) |
| **20** | Norris et al., 2007 [20] | - Females: ↓ PCS and MCS scores at baseline and 1year follow-up.   - PCS BL ♂ 67.13 vs PCS BL♀ 56.36, p<0.01   - PCS FU ♂ 61.14 vs PCS FU♀ 47.69, p<0.01   - MCS BL ♂ 67.18 vs MCS BL♀60.21, p<0.01   - MCS FU ♂ 68.67 vs MCS FU♀ 60.02, p=0.01 - Men reported higher mean adjusted PCS scores (58.84) compared to the women (53.67, p=0.008) with a mean difference of 5.17 (95%CI: 1.27-8.98). |
| **21** | Rahimi et al., 2007 [21] | Financial barriers to health care services-Mean difference (95% CI)  SAQ QOL  Adjusted for demographics: ↓ SAQ QOL [-5.94 (-8.20 to -3.68)]  Adding Clinical: ↓ SAQ QOL [- 4.04 (-6.27 to -1.80), p = 0.001]  Adding Inpatient care: ↓ SAQ QOL [-4.06 (-6.29 to -1.82)]  SF-12 PCS  Adjusted for demographics: ↓ SF-12 PCS [-5.17 (-6.7 to -3.64)]  Adding Clinical: ↓ SF-12 PCS [-2.23 (-3.6 to -0.86), p= 0.003]  Adding Inpatient care: ↓ SF-12 PCS [-2.21 (-3.58 to -0.85)]  SF-12 MCS  Adjusted for demographics: ↓ SF-12 MCS [-4.15 (-5.37 to -2.93)]  Adding Clinical: ↓ SF-12 MCS [-2.92 (-4.1 to -1.74), p<0.001]  Adding Inpatient care: ↓ SF-12 MCS [-2.94 (-4.12 to -1.76)]  Financial barriers to Medication-Mean difference (95% CI)  SAQ QOL  Adjusted for demographics: ↓ SAQ QOL [-9.64 (-12,32 to -6.95)]  Adding Clinical: ↓ SAQ QOL [-7.55 (-10,21 to -4.89), p<0.001]  Adding Inpatient care: ↓ SAQ QOL [-7.55 (-10,21 to -4.89)]  SF-12 PCS  Adjusted for demographics: ↓ SF-12 PCS [-6,00 (-7,82 to -4.18)]  Adding Clinical: ↓ SF-12 PCS [-2,69 (-4,32 to -1,07), p = 0.003]  Adding Inpatient care: ↓ SF-12 PCS [-2,63 (-4,25 to -1,01)]  SF-12 MCS  Adjusted for demographics: ↓ SF-12 MCS [-5,83 (-7,28 to -4,38)]  Adding Clinical: ↓ SF-12 MCS [-4,37 (-5,77 to -2.96), p<0.001]  Adding Inpatient care: ↓ SF-12 MCS [-4,39 (-5,79 to -2,98)] |
| **22** | Ho et al., 2008 [22] | - Older patients: ↑ baseline HRQOL (SAQ HRQOL scores 67.1 vs 64.3 vs 60.5 vs 58.8 for age groups ≥75, 65-74, 50-64, 19-49; p< .0001) - At 12 months, older patients: ↑ HRQOL (89.1 vs 88.1 vs 82.5 vs 80.0 for age groups 75, 65-74, 50-64, 19-49; p<.0001). |
| **23** | Thombs et al., 2008 [23] | Independent effect of in-hospital symptoms of depression on physical health status 12 months after ACS   - ↑SF-12 PCS before ACS: ↑ physical health status 12 months after ACS, (b=0.459, p< 0.001) - Older patients: ↓ physical health status 12 months after ACS (b=-0.190, p<0.001). - Females: ↓ physical health status 12 months after ACS (b=-0.096, p=0.018). - Higher in-hospital BDI score: ↓ physical health status 12 months after ACS (b=-0.150, p<0.001)     Independent effects of persistent symptoms of depression on physical health status 12 months after ACS   - ↑SF-12 PCS before ACS: ↑ physical health status 12 months after ACS, (b=0.451, p< 0.001). - Older patients: ↓ physical health status 12 months after ACS, (b= -0.189, p<0.001). - Females: ↓ physical health status 12 months after ACS (b=-0.084, p=0.037) - Persistent Symptoms of depression: ↓ physical health status 12 months after ACS (b= -0.220, p<0.001) |
| **24** | Arnold et al., 2009 [24] | - Females: ↓ QOL [OR (95% CI) = 1.37(1.07–1.75), p=0 .01]. - Low education (high school): ↓ QOL [OR (95% CI) = 1.34 (1.07–1.68), p=0.01]. - Having difficulty getting medical care: ↓ QOL [OR (95% CI) = 1.65 (1.19–2.31), p=0 .003]. - Congestive heart failure ↓QOL [OR (95% CI) = 1.96 (1.30–2.94), p=0.001]. - Anemia on admission ↓ QOL [OR (95% CI) = 1.60 (1.22–2.10), p=0.001]. - Depressive symptoms (PHQ-9score ≥10) ↓QOL [OR (95% CI) =1.97 (1.47–2.66), p< 0.001] - Left ventricular systolic dysfunction (Moderate or severe left ventricular dysfunction during index hospitalization (ejection fraction< 40%) ↓QOL [OR (95% CI) =1.63 (1.24–2.16), p=0.001]. - Higher baseline SF-12 score was associated with decline in physical function (Because patients with poor baseline functional status might have had little ability to decline further) [OR (95% CI) = 1.09 (1.07–1.10), p<0.001]. - Those who declined in physical function had ↓ SAQ QOL scores (79.1 vs 86.9, p<0.001). |
| **25** | Bergman et al., 2009 [25] | - Men: ↑ PCS-12 and MCS-12 at discharge and 2 weeks after discharge, p<0.05. - Men had higher values in all 5 SAQ dimensions compared with women. [Disease perception/ quality of life dimension OR (95% CI) = 1.05 (1.02–1.08), p <0.001]. - High Sense of Coherence (SOC): ↑ MCS-12 score at discharge [OR (95% CI) = 1.1 (1.03–1.2), p=0.004] and ↑ score in disease perception/quality of life SAQ dimension [OR (95% CI) = 1.04 (1.01– 1.08), p=0.015]. - Higher MCS-12 score value at discharge in the medium SOC group than in the low SOC group [OR (95% CI) = 1.1. (1.02–1.1), p=0.007]. - In Multiple Analysis patients high SOC: ↑ MCS-12 at discharge [OR (95% CI) =1.07 (1.00–1.1), p=0.04]. |
| **26** | Spertus et al., 2009 [26] | Blacks: ↓ mean unadjusted 1-year QOL than that of white patients [SAQ Quality of Life score, 80.6 (SD, 22.5) vs. 85.9 (SD, 17.2), P< 0.001); mean difference, −5.3 (CI, −7.6 to −2.9)] |
| **27** | Arnold et al., 2009 [27] | Cross-sectional analysis: (1 month) Dyspnea score  SF-12 PCS (1 month)   - Adjusted for other dyspnea-causing factors, +other demographic/clinical factors, +SAQ angina frequency: ↓ SF-12 PCS [b (95% CI) = −2.47(−2.87 to 2.08), p<0.001]   SAQ QOL (1 month)   - Adjusted for other dyspnea-causing factors, +other demographic/clinical factors, +SAQ angina frequency: ↓ SAQ QOL [b (95% CI) = −2.43(−3.29 to −1.57), p< 0.001   Longitudinal analysis: Change in dyspnea score (from 1month to 1year)  Change in SF-12 PCS   - Adjusted for other dyspnea-causing factors, + other demographic/clinical factors, +SAQ angina frequency: a 1-U increase in dyspnea severity from 1 month to 1 year was associated with a 3.8-point decrease in SF-12 PCS scores [b (95% CI) = −3.81(−4.27 to−3.36), p<0.001]   Change in SAQ QOL   - Adjusted for other dyspnea-causing factors, +other demographic/clinical factors, +SAQ angina frequency: a 1-U increase in dyspnea severity from 1 month to 1 year was associated with a 3.5-point decrease in SAQ QOL scores [b (95% CI) = −3.49(−4.24 to −2.74), p<0.001] |
| **28** | Leifheit-Limson et al., 2010 [28] | - Patients with the lowest Social Support (SS) (relative to those with the highest) had lower disease-specific quality of life (mean difference, b= -3.33, 95% CI= -5.25, -1.41), and lower mental functioning (b=-1.72; 95% CI= -2.65, -0.79). - Lower SS: ↓ disease-specific QOL, PCS and MCS (SAQ QoL total p<0.001), SF-12PCS p<0.001, 12MCS p<0.001). - Τhe relationship between SS and QOL was stronger for women (p<0.02) - Women tended to have ↓ QOL, particularly among the low SS group. A significant interaction between SS (low VS high SS or moderate VS high SS) and female sex was observed for:   - SAQ QoL (p=0.015, low SS female sex: b (95%CI) = -4.89 (-8.61, -1.16), moderate SS female sex b (95% CI) = -3.29 (-6.38, -0.19),   - SF-12 PCS (p=0.014; low SS female sex: b (95%CI) = -3.12 (-5.22, -1.02), moderate SS female sex: b (95% CI) = - 0.90 (-2.64, 0.83). |
| **29** | Shin & Choi, 2010 [29] | Time 1: Baseline   - Higher scores in mental health: ↑ perceived health status (r=0 .85, p<0.05) - Higher scores in physical health: ↑ perceived health status (r= 0.88, p<0.05) - Higher scores in physical health: ↑ perceived mental health (r=0.56, p<0.05) - Higher scores in BDI: ↓ perceived health status (r= −0.63, p<0.05) - Higher scores in BDI: ↓perceived mental health (r= −0.70, p<0.05) - Higher scores in BDI: ↓perceived physical health (r= −0.44, p<0.05)   Time 2: 1-month post discharge   - Higher scores in mental health: ↑ perceived health status (r= 0.83, p<0.05) - Higher scores in physical health: ↑ perceived health status (r=0.92, p<0.05) - Higher scores in physical health: ↑ perceived mental health (r=0.58, p<0.05 - Higher scores in BDI: ↓perceived health status (r= −0.62, p<0.05) - Higher scores in BDI: ↓perceived mental health (r=−0.76, p<0.05) - Higher scores in BDI: ↓ perceived physical health (r= −0.42, p<0.05) - Annual household income ≤$40,000: ↓ perceived health status at Time 1 and at Time 2   - ≤$40,000 (SF12 T1 338.36±159.87) (SF12 T2 368.91±158.60) p<0.05   - >$40,000 (SF12 T1 465.05±146.84) (SF12 T2 514.32±14.71) p<0.05      - African Americans VS Caucasian patients: ↓ perceived health status at Time 2   - Caucasian (SF12 T2 473.06±163.16) p<0.05.   - African American (SF12 T2 285.29±151.71) p<0.05. - History of depression: ↓ perceived health status at Time 1 and Time 2   History of depression:   - - Yes (SF12 T1 294.28±96.72) (SF12 T2 376.22±133.48) p<0.05.   - No (SF12 T1 448.79±169.84) (SF12 T2 479.76±172.76) p<0.05.      - Prescription of antidepressants: ↓ perceived health status at Time 1 and Time 2   Prescription of antidepressants:   - - Yes (SF12 T1 324.18±137.68) (SF12 T2 390.05±147.90) p<0.05.   - No (SF12 T1 442.22±168.82) (SF12 T2 477.23±171.76) p<0.05. |
| **30** | de Jong-Watt & Sherifi, 2011[30] | - Higher perceived social support and higher annual income: ↑ treatment satisfaction and Cardiac-HRQOL (p < 0.05). |
| **31** | Bucholz et al., 2011 [31] | Baseline health status   - Living alone: ↓ mean SAQ quality of life [mean (sd) living alone=59.7 (24.4), mean (sd) not living alone= 62.5 (23.2)] - Living alone: ↓ SF-12 PCS score [mean (sd) living alone= 40.0 (12.9), mean (sd) not living alone= 44.0 (12.2) p<0.001]   Adjusted 1-year health status measures   - Living alone: ↓ Mean quality of life scores [ SAQ quality of life score, mean (SE): living alone= 73.3(4.4), not Living alone= 76.2 (4.4), Difference (Living Alone -Not Living Alone) Mean (95% CI)= −2.91 (−5.56, −0.26), p= 0.034 |
| **32** | Dueñas et al., 2011 [32] | ♂ Predictors of QOL   - Older age: ↓ PCS [B (CI 95%) =-0.25 (-0.35, -0.14), p=0.000] - Previous history of CHD: ↓ PCS [B (CI 95%) =-3.29 (-5.88, -0.69), p=0.013] - Rehospitalization (Between 3 and 6 months): ↓ PCS [B (CI 95%) =-9.79 (-17.48, -2.10), p= 0.013] - GHQ-28 (Mental health): ↓ PCS [B (CI 95%) = -1.46 (-1.90, -1.02), p=0.000] - 6 months after AMI: ↑ PCS [B (CI 95%) = 3.44 (0.64, 6.24), p= 0.016] - Comorbidity: ↓ Vitality [B (CI 95%) =-9.53 (-15.06, -3.99), p=0.001] - GHQ-28: ↓ Vitality [B (CI 95%) =-3.75 (-4.77, -2.74) p=0.000] - Older age: ↓ Social Functioning [B (CI 95%) =-0.54 (-0.89, -0.19), p=0.002] - Frequency of angina (≥ 1 between baseline-3 months): ↓ Social Functioning [B (CI 95%) = -22.94 (-42.04, -3.85), p=0.019] - Frequency of angina ((≥ 1 between 3 and 6 months): ↓ Social Functioning [B (CI 95%) =-21.62 (-37.02, -6.22), p=0.006] - GHQ-28: ↓ Social Functioning [B (CI 95%) =-2.87 (-3.98, -1.75), p=0.000] - 6 months after AMI: ↑ Social Functioning [B (CI 95%) = 8.1 (2.71, 13.49), p=0.003] - GHQ-28: ↓ Role emotional [B (CI 95%) =-2.20 (-3.76, -0.64), p=0.006] - 3 months after AMI: ↑ Role emotional [B (CI 95%) =10.90 (4.84, 16.96), p=0.000] - Revascularization (Between baseline-3 months): ↑ Mental Health [B (CI 95%) = 20.91 (4.72, 37.10), p=0.011] - Frequency of angina (≥1 between baseline-3 months): ↓ Mental Health [B (CI 95%) =-12.68 (-22.39, -2.97), p=0.01] - Return to work 4 (Between baseline-3 months): ↑ Mental Health [B (CI 95%) = 7.48 (0.25, 14.71), p=0.043] - GHQ-28: ↓ Mental Health [B (CI 95%) = -1.83 (-2.84, -0.83), p=0.000]   ♀ Predictors of QOL   - Previous history of CHD: ↓ PCS [B (CI 95%) = -8.32 (-12.20, -4.45), p=0.000] - Diagnostic group (AMI): ↑ PCS [B (CI 95%) = 4.52 (0.36, 8.68), p=0.033] - Frequency of angina ((≥ 1 between 3 and 6 months): ↓ PCS [B (CI 95%) =-10.58 (-15.91, -5.24), p=0.000] - GHQ-28: ↓ PCS [B (CI 95%) = -0.57 (-0.86, -0.27), p=0.000] - 6 months after AMI: ↑ PCS [B (CI 95%) = 8.8 (5.51, 12.09), p=0.000] - Revascularization (Between 3 and 6 months): ↓ MCS [B (CI 95%) = -25.75 (-33.90, -17.59), p=0.000] - Frequency of angina ((≥ 1 between 3 and 6 months): ↓ MCS [B (CI 95%) =18.21 (7.87, 28.54), p=0.001] - GHQ-28: ↓ MCS [B (CI 95%) =-1.34 (-1.64, -1.04), p=0.000] |
| **33** | Ginzburg & Ein-Dor, 2011 [33] | - Chronic group: ↓ Physical HRQoL VS Recovered/resilient group [75.70 (22.01) VS 45.51 (17.49), t= 6.31, p<0.001] - Chronic group: ↓ Mental HRQoL VS Recovered/resilient group [81.97 (16.99) VS 70.57 (13.62), t=3.09, p<0.01] - Severity of ASD at initial hospitalization: ↓ physical health (r=−0.27, p<0.01) - Severity of ASD at initial hospitalization: ↓ mental health (r=−0.30, p<0.01) - Severity of PTSD at 7 months after MI: ↓ physical health r=−0.38, p<0.001) - Severity of PTSD at 7 months after MI: ↓ mental health r=−0.41, p<0.001) - Severity of PTSD at 8 years after MI: ↓ physical health (r=−0.44, p<0.001) - Severity of PTSD at 8 years after MI: ↓ mental health (r=−0.49, p<0.001) - Chronic group, the greater the initial probability of having ASD, the lower the physical (b=−16.57, p<0.001) and mental (b=−21.31, p<0.001) HRQOL 8 years after MI. |
| **34** | Panthee et al., 2011 [34] | - History of re-infarction: ↓ QoL (p <0.05). - Patients who needed revascularization: ↓ QoL (p <0.05). - Problem-focused coping: ↑ overall QoL (r = 0.41, p <.01), particularly health and functioning dimension (r= 0.39, p <0.01) and socio-economic dimension (r= 0.46, p <0.01). |
| **35** | Brink et al., 2012 [35] | - Females: ↓ PCS [♀ 41.95 (11.43), ♂ 46.55 (9.76), p= 0.015] - Older age: ↓ PCS (r=-0.229, p< 0.01) - Fatigue: ↓ PCS (r=-0.602, p< 0.001) - Disturbed sleep: ↓ PCS (r=-0.384, p< 0.001 - Increased levels of GSE: ↑ PCS (r=0.177, p< 0.05) - Fatigue: ↓MCS (r=-0.678, p< 0.001) - Disturbed sleep: ↓MCS (r=-0.383, p< 0.001) - Increased levels of GSE: ↑MCS (r=0.246, p< 0.01) - Better MCS: ↑PCS (r=0.283, p< 0.01) |
| **36** | Leifheit-Limson et al.,2012 [36] | Baseline support entered separately:   - Low baseline support: ↓ SAQ QOL [b (95%CI) =−2.65(−4.85, −0.45), p=0.02] - Low baseline support: ↓ SF-12 MCS [b (95%CI) =−2.57(−3.70, −1.44), p<0.001]   1-Month support entered separately   - Low 1-month support: ↓ SAQ QOL [b (95%CI) =−7.41(−9.75, −5.06), p<0.001] - Low 1-month support: ↓ SF-12 MCS [b (95%CI) =−4.97(−6.18, −3.76), p<0.001]   Baseline and 1-month support entered simultaneously   - Low1-month support: ↓ SAQ QOL [b (95%CI) =−7.19 (−9.65, −4.73), p<0.001] - Low baseline support: ↓ SF-12MCS [b (95%CI) =−1.35(−2.50, −0.19), p=0.02] - Low1-monthsupport: ↓ SF-12MCS [b (95%CI) =−4.54(−5.80, −3.28), p<0.001 |
| **37** | Brink., 2012 [37] | PCS   - Fatigue: ↓ PCS (b=-0.430, p<0.001) - Older age: ↓ PCS (b=-0.297, p<0.001) - Females: ↓ PCS (b=0.183, p= 0.026)   MCS   - Depression: ↓ MCS (b=-0.337, p=0.001) - Fatigue: ↓ MCS (b=-.0337, p=0.001) - Older age: ↑ MCS (b= 0.159, p=0.042) |
| **38** | Williams et al., 2012 [38] | Time 2 quality of life (3-months post-MI)  Impaired LVF: ↓ QOL (b=−0.165, 95% CI= −9.48, −1.0, p<0.05)  Negative Affect (characteristic of Type D Personality): ↓ QOL (b=−0.624, 95% CI=−5.06, −0.32, p<0.01)  Type D personality: ↓ QOL [Type D individuals (M=86.41, SD=18.85), non-Type D individuals (M=122.17, SD=25.52), t=8.34, p<0.001] |
| **39** | Sertoz et al., 2013 [39] | Physical domain   - Older age: ↓ physical QOL (B =–0.149, p = 0.002) - Female gender: ↓ physical QOL (B =–3.314, p = 0.006) - Low education level: ↓ physical QOL (B = 0.405, p < 0.0001) - Hypertension: ↓ physical QOL (B = 4.835, p < 0.0001) - Higher BDI score: ↓ physical QOL (B =–0.993, p <0.0001)   Psychological domain   - Female gender: ↓ Psychological QOL (B =–2.723, p = 0.013) - Low education level: ↓ Psychological QOL (B = 0.436, p < 0.0001) - Higher BDI score: ↓ Psychological QOL (B =–1.114, p < 0.0001)     Social relations domain:   - Older age: ↓ Social relations QOL (B=–0.248, p < 0.0001) - low education level: ↓ Social relations QOL (B = 0.436, p = 0.002) - Hypertension: ↓ Social relations QOL (B = 3.232, p = 0.030) - Comorbid medical conditions: ↓ Social relations QOL (B =–3.738, p = 0.018) - Higher BDI score: ↓ Social relations QOL (B =–1.170, p < 0.0001)   environmental domain   - Low education level: ↓ environmental QOL (B = 0.681, p < 0.0001) - Higher BDI score: ↓environmental QOL (B =–0.667, p < 0.0001) |
| **40** | Hosseini et al., 2014 [40] | PCS   - Older Age: ↓ PCS (b= -0.247, p= 0.001) - Low Education level: ↓ PCS (b=0.180, p=0.019) - CABG history: ↓ PCS (b=-0.213, p=0.002) - CVA history: ↓ PCS (b=-0.250, p= 0.000) - Q-wave MI: ↓ PCS (b=0.165, p=0.019) - Thrombolysis: ↓ PCS (b=-0.174, p=0.011) - BDI score≥ 10: ↓ PCS (b= -0.151, p=0.026)   MCS   - Females: ↓ MCS (B= -0.171, p=0.011) - Hypercholesterolemia: ↓ MCS (B=-0.226, p=0.001) - CVA history: ↓ MCS (B=-0.306, p=0.000) - BDI score≥10: ↓ MCS (B=-0.249, p=0.000) |
| **41** | Bennett et al., 2015 [41] | - Low Income: ↓ SAQ-QoL (r=0.10), ↓ SF-12 PCS (r=0.35), ↓SF-12 MCS (r=0.11), p<0.05 - Low Education: ↓ SF-12 PCS (r=0.20), p<0.05 - Insurance status (yes) at baseline: ↑SAQ-QoL (r=0.26), ↑SF-12PCS (r=0.11), ↑SF-12MCS (r=0.25), p<0.05 - ↑ Reserves at the end of the month ↑SAQ-QoL (r=0.22), ↑SF-12PCS (r=0.28) ↑ SF-12MCS (r=0.22), p<0.05 - ↑ Median household income in residential zip code at baseline: ↑ SF-12PCS (r=0.18), p<0.05 - ↓ Social Support at 1 month (ESSI): ↓SAQ-QoL (r=0.14), ↓SF-12PCS (r=0.09), ↓SF-12MCS (r= 0.30), p<0.05 - ↑ Life Orientation Test-Revised at 1-month (LOT-R): ↑SAQ-QoL (r=0.22), ↑SF-12PCS (r=0.18), ↑SF-12MCS (r= 0.28) p<0.05 - Health locus of control at 1 month (HLC): ↑SF-12PCS (r=0.12), ↑SF-12MCS (r=0.05), p<0.05 - ↑ Perceived Stress Scale-4 at 1-month (PSS-4): ↓SAQ-QoL (r= -0.34), ↓SF-12PCS (r=-0.25), ↓SF-12 MCS (r=-0.42), p<0.05 - Depressive symptoms at 6 months PHQ-9: ↓SAQ-QoL (r=-0.42), ↓SF-12PCS (r=-0.37), ↓SF-12MCS (r=-0.52), p<0.05 - ↑SAQ-QoL: ↑SF-12PCS (r=0.35), ↑SF-12MCS (r= 0.45), p<0.05 - ↑SF-12PCS: ↑SF-12MCS (r= 0.05), p<0.05 - Low baseline Socioeconomic status (SES): ↓ SF-12 PCS scores [b = 0.17, 95 % CI= (0.08, 0.25), p<0.001] - Low SES: ↓ SF-12MCS (b=0.08, p<0.01) - Reserve capacity (variable comprised of perceived social support, optimism, and health locus of control) at 1 month: ↑ SF-12 MCS scores (b = 0.22, 95%CI= 0.09, 0.35) - Negative emotions at 6 months (PHQ-9): ↓ SF-12 MCS (b =-0.22, 95 % CI= -0.28, -0.15) - ↓SES: ↓ SAQ-QoL (b= 0.07, p<0.10) |
| **42** | Salazar et al., 2016 [42] | Physical dimensions of SF-36.   - Older Age: ↓ BP [B= −0.5, C.I. (95%) = −0.8, −0.3, p<0.001] - Single/Separated: ↓ GH [B= −14.5, C.I. (95%) = −26.8, −2.2, p<0.05] - Widow(er): ↓ PF [B=−23.2, C.I. (95%) = −42.7, −3.8, p<0.05] - Performing heart-healthy physical activity: ↑ PF [B= 13.9, C.I. (95%) = 6.7, 21.2, p<0.001] - Previous history CHD: ↓ PCS [B=−5.2, C.I. (95%) = −8.4, −1.9, p<0.01] - Higher scores in depression (GHQ-28): ↓PCS [B= −1.2, C.I. (95%) = −1.5, −0.8, p<0.001] - Hypertension: ↓ RP [B=−19.8, C.I. (95%) = −34.8, −4.7, p<0.01] - Τime 6 months: ↑ RP [B=13.3, C.I. (95%) = 0.3, 26.3, p<0.05   Mental dimensions of SF-36   - Females: ↓ MCS [B= −7.0, C.I. (95%) = −13.1, −0.8, p< 0.05] - Older age: ↓ VT [B= −0.3, C.I. (95%) = −0.5, −0.1, p< 0.05] - Single/Separated: ↓ SF [B= −14.1, C.I. (95%) = −26.7, −1.4, p< 0.05] - Single/Separated: ↓MH [B= −23.3, C.I. (95%) = −44.3, −2.4, p< 0.05] - Widow(er): ↓ SF [B= −29.8, C.I. (95%) = −39.6, −20.0, p<0.001] - Hypertension: ↓ VT [B= −8.9, C.I. (95%) = −14.9, −2.9, p< 0.01] - Higher scores in (GHQ-28) ↓ Mental Health-: ↓ VT [B= −3.8, C.I. (95%) = −4.3, −3.2, p<0.001] Higher scores in (GHQ-28) ↓ Mental Health: ↓ SF [B= −2.6, C.I. (95%) = −3.5, −1.7, p<0.001] |
| **43** | Dzubur et al., 2016 [43] | - In the QOL subscale “physical role”, the lowest scores identified in the group treated with medications (group I) and the highest in the group who underwent PCI immediately after the incident (group II): [I group 46.5±28.0, II group 65.6±24.3, III group 54.8±28.0, IV group 61.2±31.2, p= 0.017] - In the QOL subscale “social functioning”, the lowest scores identified in the group III who underwent delayed PCI and the highest in the group IV who underwent coronary artery bypass surgery: [I group 63.1±27.8, II group 70.6±19.7, III group 60.0±22.3, IV group 75.6±24.5, p=0.016] - ↑ LVEF: ↑ QOL at all subscales, in all groups   Group I (treated with medications)   - LVEF: ↑ all QOL scales (p=0.00)   Group II (PCI immediately after the incident)   - ↑ LVIDd: ↓Physical functioning (r=-0.31 p=0.045) - ↑ LVIDd: ↓ general health (r=-0.35, p=0.02 6) - LVEF: ↑ vitality (p=0.02), mental health (p=0.00), pain (p=0.00) and general health (p=0.02) - Mitral regurgitation (MR): ↑vitality (p=0.04).     Group III (delayed PCI)   - ↑ LVIDd: ↑ pain-: (r=0.35, p=0.02) - LVEF: ↑ emotional role (p=0.00) - Mitral regurtation: ↓ the physical functioning (p=0.00), physical role (p=0.00) and social functioning (p=0.01)     Group IV (coronary artery bypass surgery)   - Mitral regurtation: ↓ emotional role (p=0.03) and mental health (p=0.02). |
| **44** | Mahesh et al., 2017 [44] | - Patients with STEMI: ↑ pre-event QOL than patients with NSTEMI in 7/8 domains (General-health p=0.003, Physical- functioning p=0.012, Pain p=0.004, Role-limitation-physical p=0.002, Role-limitation-emotional p=0.006, Social-functioning p=0.028, Emotional Well-being p=0.007 - Patients with STEMI: ↑ post discharge QOL than patients with NSTEMI in 1 domain: General-health (p=0.042) - In Patients with STEMI ↑ pre-event QOL ↑ discharge QOL in 5 domains   - General Health: (b=0.625, p<0.001)   - Physical-Functioning: (b=0.335, p=0.002)   - Vitality: (b=0.465, p<0.001)   - Social-Functioning: (b= 0.297, p=0.020)   - Emotional Well-Being: (b= 0.566, p<0.001) - In patients with NSTEMI ↑ pre-event QOL: ↑ post-discharge QOL in all domains (all p<0.001)   - General Health: b=0.673   - Physical-Functioning: b=0.494   - Pain: b=0.358   - Role Limitation-physical: b=0.203   - Role Limitation-emotional: b=0.333   - Vitality: b=0.490   - Social-Functioning: b=0.445   - Emotional Well-Being: b= 0.536 |
| **45** | Kang et al., 2018 [45] | - Younger age: ↑ HRQOL at three months (b=-0.216, t=-2.715, p=0.008) - Diagnosed with STEMI: ↑ HRQOL at three months (b=-0.163, t=-2.119, p=0.036), - Higher LVEF at baseline: ↑ HRQOL at three months (b=0.207, t=2.606, p=0.010), - Patients’ better understanding of their illness: ↑ HRQOL at three months (b=0.213, t=2.755, p=0.007) - Perceived higher social support at baseline ↑ HRQOL at three months (b=0.199, t=2.515, p=0.013) - Higher score of depression at baseline: ↓ HRQOL at three months (b=-0.201, t=-2.644, p=0.009) |
| **46** | Xia et al., 2019 [46] | - Baseline comorbidity of depression and anxiety: ↓ 12-month SF-12 QOL [OR= 1.77, 95% CI=1.22–2.52, p=0.003] - Baseline comorbidity of depression and anxiety: ↓ 12-month PCS [OR= 1.62, 95% CI=1.12–2.29, p=0.01] - Baseline comorbidity of depression and anxiety: ↓ 12-month MCS [OR= 1.75, 95% CI=1.20–2.47, p=0.004] - Patients with baseline comorbidity of depression and anxiety had the lowest QOL at baseline compared to patients with only depression, only anxiety and normal group (p < 0.0001). - Significant differences existed in follow up scores of SF-12 (lowest the depression group, p=0.04) and MCS (lowest the comorbid group with depression and anxiety, p= 0.004). |
| **47** | Kang et al., 2021 [47] | - Higher Education: ↑ HRQoL (b=0.228, t=3.688, p= .000) - Better perceived Financial status: ↑ HRQoL (b=−0.169, t=−2.705, p=.008) - Diabetes: ↓ HRQoL (b=−0.210, t=−3.480, p=.001) - History of Stroke: ↓ HRQoL (b=−0.150, t=−2.458, p=.015) - History of other heart disease: ↓ HRQoL (b=−0.193, t=−3.207, p=.002) - Higher score of the DASS 21 total: ↓ HRQoL (b=−0.442, t=−7.224, p= .000) |
| **48** | Wulandari et al., 2020 [48] | - Females: ↓HRQL (b = 0.190, p < 0.05). - Higher cardiac anxiety: ↓HRQOL (b = - 0.553, p = 0.00). - Higher the marital satisfaction: ↑HRQOL (b = 0.271, p = 0.00). |
| **49** | Džubur et al., 2022 [49] | - Depression: ↓ eight subscales of QOL   - Physical functioning (r = -0.701, p <0.01)   - physical role (r= -0.538, p <0.01)   - pain (r= -0.477, p <0.01)   - general health (r= -0.510, p <0.01)   - vitality (r= -0.453, p<0.01)   - Emotional role r= -0.212, p<0.01)   - Social function r= -0.359, p<0.01)   - Mental health r=-0.218, p<0.01) - >65 years ♀: ↓ physical functioning (p =0.019) - >65 years ♀: ↓ general health (p=0.001) - <65 years ♀: ↓ emotional role (p=0.014) - <65 years ♀: ↑ general health (p =0.028) |
| **50** | Rasmussen et al., 2022 [50] | Females: ↓ HRQOL [SF-12 PCS. SF-12 MCS, HeartQoL global, HeartQoL emotional, HeartQoL physical score, EQ-5D-5L and EQ VAS] (p<0.05).  Adjusted model:(b (95% CI)  SF-12 PCS: -1.34 (- 2.42; -0.26)  SF-12 MCS: -1.36 ( -2.55; -0.17)  HeartQoL—global: -0.11 ( -0.18; -0.03)  HeartQoL—physical: -0.11 ( -0.19; -0.02)  HeartQoL—emotional: 0.11 ( -0.19; -0.02)  EQ-5D-5L: -0.03 ( -0.05; -0.01)  EQ VAS: - 3.22 ( -5.21; -1.24) |
| **51** | Upadhyay et al., 2022 [51] | - ↑ Perceived Social Support (MSPSS): ↑ total QoL [b =0.05, 95% CI = (0.02, 0.07), p < 0.001] - ↑ Cardiac Depression: ↓ QoL Total (b = − 0.0256, 95% CI = (− 0.0290, − 0.0221), p < 0.001)   QoL Total   - ↑ Cardiac Depression Rating Scale (CDS): ↓ QoL Total (r=− 0.929, p < 0.001) - ↑Perceived Social Support (MSPSS): ↑ QoL Total (r=0.799, p < 0.001)   QoL Emotional   - ↑ Cardiac Depression Rating Scale (CDS): ↓ QoL Emotional (r=− 0.872, p < 0.001) - ↑Perceived Social Support (MSPSS): ↑ QoL Emotional (r= 0.778, p < 0.001)     QoL Physical   - ↑ Cardiac Depression Rating Scale (CDS): ↓ QoL Physical (r=− 0.913, p < 0.001) - ↑Perceived Social Support (MSPSS): ↑ QoL Physical (r=0.797, p < 0.001)   QoL Social  ↑ Cardiac Depression Rating Scale (CDS): ↓ QoL Social (r=− 0.919, p < 0.001)  ↑Perceived Social Support (MSPSS): ↑ QoL Social (r=0.790, p < 0.001) |
| **52** | Jlassi et al., 2023 [52] | Global QOL   - Hospital stay: ↑ Global QOL (b= 0.440, p=0.004) - Type 2 diabetes: ↑Global QOL (b=0.396, p=0.008) - Smoking p/y: ↓ Global QOL (b= −0.424 p=0.008) - number of Children in charge: ↑Global QOL (b= 0.312, p=0.046)   Physical QOL   - Hospital stay: ↑ Physical QOL (b= 0.081, p=0.003)   Emotional QOL   - Type 2 diabetes: ↑ Emotional QOL (b=0.415, p=0.012) - Smoking p/y: ↓ Emotional QOL (b=−0.417, p=0.011)   Social QOL   - Hospital stay: ↑ Social QOL (b=0.359, p=0.010) - Type 2 diabetes: ↑Social QOL (b=0.411, p=0.003) - Smoking p/y: ↓ Social QOL (b=−0.502 p=0.001) - LVEF: ↑ Social QOL (b=0.337, p=0.014) |
| **53** | Sauletzhanovna et al., 2024 [53] | SF-36 PCS  HADS-Anxiety score: ↓ PCS [b (95% CI) = -0.82 (-1.02, -0.62), p< 0.001]  HADS-Depression score: ↓ PCS [b (95% CI) =-0.78 (-0.98, -0.58), p< 0.001]  PHQ-9 score: ↓ PCS [b (95% CI) =-0.75 (-0.93, -0.57), p< 0.001]    SF-36 MCS  HADS-Anxiety score: ↓ MCS [b (95% CI) =-1.24 (-1.44, -1.04), p< 0.001]  HADS-Depression score: ↓ MCS [b (95% CI) =-1.18 (-1.38, -0.98), p< 0.001]  PHQ-9 score: ↓ MCS [b (95% CI) =-1.15 (-1.33, -0.97), p< 0.001] |
| **54** | Füller et al., 2025 [54] | - Lower education level: ↓ HRQoL at baseline and at follow-up (EQ-5D index value baseline p= 0.005// EQ-5D index value Follow-up, p= 0.01) - Poor financial situation: ↓ HRQoL at baseline and at follow-up (EQ VAS Follow-Up, p= 0.05// Change EQ VAS Baseline- Follow-up, p= 0.02) - Lower occupational qualification: ↓ HRQoL at follow-up (EQ-5D index value Follow-Up, p=0.03// Change EQ VAS Baseline- Follow-up, p= 0.02) |
| **55** | Malm et al., 2025 [55] | - Higher SOC-13 scores at baseline: ↑ mental health at the 10-year follow-up (B= 0.51, p< 0.001) - higher SOC-13 scores at baseline: ↑ physical health at the 10-year follow-up (B= 0.41, p < 0.05) - Higher SOC-13 scores at baseline: ↑Treatment satisfaction at the 10-year follow-up (B=0.79, p< 0.01) - Higher SOC-13 scores at baseline: ↑Disease perception domain at the 10-year follow-up (B=0.66, p<0.10) - Three significant interaction effects showed that a higher SOC-13 score at baseline is associated with higher than expected QoL at 10-year follow-up for women but not for men   - PCS-12: SOC × gender/ comprehensibility: (B=−1.45, p< 0.05)   - Treatment satisfaction SAQ-QOL: SOC × gender/ meaningfulness: (B=−2.57, p< 0.05) |
| ♀: women; ♂ men; ↓: negative association with Health-Related Quality of Life; ↑: positive association with Health-Related Quality of Life.  ACE, Angiotensin-Converting Enzyme inhibitors; ACS, Acute Coronary Syndrome; AMI, Acute Myocardial Infarction; ARB, Angiotensin Receptor Blockers; ASD, Acute Stress Disorder; BDI, Beck Depression Inventory; BP, Bodily pain; CABG, Coronary Artery Bypass Graft; CHD, Coronary Heart Disease; CVA, Cerebrovascular Accident; CΙ, Confidence Interval; DASS 21, Depression Anxiety Stress Scales-21 items; GH, General Health; GHQ-28, General Health Questionnaire-28; GSE, General Self-Efficacy; HLC, Health locus of control; HRQOL, Health-Related Quality of Life; LOT-R, Life Orientation Test-Revised; LVEF, Left Ventricular Ejection Fraction; LVF, Left Ventricular Function; MCS, Mental Component Summary; MH, Mental Health; MI, Myocardial Infarction; MSPSS, Multidimensional Scale of Perceived Social Support; PCI, Percutaneous Coronary Intervention; PCS, Physical Component Summary; PF, Physical Functioning; PHQ-9, Patient Health Questionnaire-9; PSS-4, Perceived Stress Scale-4; PTSD, Post-Traumatic Stress Disorder; QOL, Quality of Life; RE, Role Emotional; RP, Role Physical; SAQ, Seattle Angina Questionnaire; SES, Socioeconomic status; SF, Social Functioning; SF-12, Short Form-12 Questionnaire; SF-36, Short Form-36 Questionnaire; SOC, Sense of Coherence; SS, Social Support; STEMI, “ST” Elevation Myocardial Infarction; VT, Vitality. | | |

**References**

1. Bogg, J., Thornton, E., & Bundred, P. (2000). Gender variability in mood, quality of life and coping following primary myocardial infarction. *Coronary Health Care*, *4*(4), 163–168. https://doi.org/10.1054/chec.2000.0095

2. Fritz, H. L. (2000). Gender-Linked Personality Traits Predict Mental Health and Functional Status Following a First Coronary Event. https://doi.org/10.1037/0278-6133.19.5.420

3. Lane, D., Carroll, D., Ring, C., Beevers, D. G., & Lip, G. Y. H. (2000). Effects of depression and anxiety on mortality and quality-of-life 4 months after myocardial infarction. *Journal of Psychosomatic Research*, *49*(4), 229–238. https://doi.org/10.1016/S0022-3999(00)00170-7

4. Mayou, R. A., Gill, D., Thompson, D. R., Day, A., Hicks, N., Volmink, J., & Neil, A. (2000). Depression and Anxiety As Predictors of Outcome After Myocardial Infarction: *Psychosomatic Medicine*, *62*(2), 212–219. https://doi.org/10.1097/00006842-200003000-00011

5. Radley, A., Grove, A., Wright, S., & Thurston, H. (2000). Gender-role identity after heart attack: Links with sex and subjective health status. *Psychology & Health*, *15*(1), 123–133. https://doi.org/10.1080/08870440008400293

6. Beck, C. A., Joseph, L., Bélisle, P., & Pilote, L. (2001). Predictors of quality of life 6 months and 1 year after acute myocardial infarction. *American Heart Journal*, *142*(2), 271–279. https://doi.org/10.1067/mhj.2001.116758

7. Lane, D., Carroll, D., Ring, C., Beevers, D. G., & Lip, G. Y. H. (2001). Mortality and Quality of Life 12 Months After Myocardial Infarction: Effects of Depression and Anxiety: *Psychosomatic Medicine*, *63*(2), 221–230. https://doi.org/10.1097/00006842-200103000-00005

8. Rumsfeld, J. S., Magid, D. J., Plomondon, M. E., O’Brien, M. M., Spertus, J. A., Every, N. R., & Sales, A. E. (2001). Predictors of quality of life following acute coronary syndromes. *The American Journal of Cardiology*, *88*(7), 781–784. https://doi.org/10.1016/S0002-9149(01)01852-5

9. Brink, E., Karlson, B. W., & Hallberg, L. R.-M. (2002). Health experiences of first-time myocardial infarction: Factors influencing women’s and men’s health-related quality of life after five months. *Psychology, Health & Medicine*, *7*(1), 5–16. https://doi.org/10.1080/13548500120101522

10. McBurney, C. R., Eagle, K. A., Kline‐Rogers, E. M., Cooper, J. V., Mani, O. C. M., Smith, D. E., & Erickson, S. R. (2002). Health‐Related Quality of Life in Patients 7 Months After a Myocardial Infarction: Factors Affecting the Short Form‐12. *Pharmacotherapy: The Journal of Human Pharmacology and Drug Therapy*, *22*(12), 1616–1622. https://doi.org/10.1592/phco.22.17.1616.34121

11. Rumsfeld, J. S., Magid, D. J., Plomondon, M. E., Sales, A. E., Grunwald, G. K., Every, N. R., & Spertus, J. A. (2003). History of depression, angina, and quality of life after acute coronary syndromes. *American Heart Journal*, *145*(3), 493–499. https://doi.org/10.1067/mhj.2003.177

12. Bengtsson, I., Hagman, M., Währborg, P., & Wedel, H. (2004). Lasting impact on health-related quality of life after a first myocardial infarction. *International Journal of Cardiology*, *97*(3), 509–516. https://doi.org/10.1016/j.ijcard.2003.12.011

13. Brink, E., Grankvist, G., Karlson, B. W., & Hallberg, L. R.-M. (2005). Health-related quality of life in women and men one year after acute myocardial infarction. *Quality of Life Research*, *14*(3), 749–757. https://doi.org/10.1007/s11136-004-0785-z

14. Fauerbach, J. A., Bush, D. E., Thombs, B. D., McCann, U. D., Fogel, J., & Ziegelstein, R. C. (2005). Depression Following Acute Myocardial Infarction: A Prospective Relationship With Ongoing Health and Function. *Psychosomatics*, *46*(4), 355–361. https://doi.org/10.1176/appi.psy.46.4.355

15. Spertus, J., Safley, D., Garg, M., Jones, P., & Peterson, E. D. (2005). The Influence of Race on Health Status Outcomes One Year After an Acute Coronary Syndrome. *Journal of the American College of Cardiology*, *46*(10), 1838–1844. https://doi.org/10.1016/j.jacc.2005.05.092

16. Dickens, C. M., McGowan, L., Percival, C., Tomenson, B., Cotter, L., Heagerty, A., & Creed, F. H. (2006). Contribution of depression and anxiety to impaired health-related quality of life following first myocardial infarction. *British Journal of Psychiatry*, *189*(4), 367–372. https://doi.org/10.1192/bjp.bp.105.018234

17. De Jonge, P., Spijkerman, T. A., Van Den Brink, R. H. S., & Ormel, J. (2006). Depression after myocardial infarction is a risk factor for declining health related quality of life and increased disability and cardiac complaints at 12 months. *Heart*, *92*(1), 32–39. https://doi.org/10.1136/hrt.2004.059451

18. Peterson, P. N., Spertus, J. A., Magid, D. J., Masoudi, F. A., Reid, K., Hamman, R. F., & Rumsfeld, J. S. (2006). The impact of diabetes on one-year health status outcomes following acute coronary syndromes. *BMC Cardiovascular Disorders*, *6*(1), 41. https://doi.org/10.1186/1471-2261-6-41

19. Failde, I. I., & Soto, M. M. (2006). Changes in health related quality of life 3 months after an acute coronary syndrome. *BMC Public Health*, *6*(1), 18. https://doi.org/10.1186/1471-2458-6-18

20. Norris, C. M., Hegadoren, K., & Pilote, L. (2007). Depression Symptoms have a Greater Impact on the 1-Year Health-Related Quality of Life Outcomes of Women Post-Myocardial Infarction Compared to Men. *European Journal of Cardiovascular Nursing*, *6*(2), 92–98. https://doi.org/10.1016/j.ejcnurse.2006.05.003

21. Rahimi, A. R., Spertus, J. A., Reid, K. J., Bernheim, S. M., & Krumholz, H. M. (2007). Financial Barriers to Health Care and Outcomes After Acute Myocardial Infarction. *JAMA*, *297*(10), 1063. https://doi.org/10.1001/jama.297.10.1063

22. Ho, P. M., Eng, M. H., Rumsfeld, J. S., Spertus, J. A., Peterson, P. N., Jones, P. G., Peterson, E. D., Alexander, K. P., Havranek, E. P., Krumholz, H. M., & Masoudi, F. A. (2008). The influence of age on health status outcomes after acute myocardial infarction. *American Heart Journal*, *155*(5), 855–861. https://doi.org/10.1016/j.ahj.2007.11.032

23. Thombs, B. D., Ziegelstein, R. C., Stewart, D. E., Abbey, S. E., Parakh, K., & Grace, S. L. (2008). Usefulness of Persistent Symptoms of Depression to Predict Physical Health Status 12 Months After an Acute Coronary Syndrome. *The American Journal of Cardiology*, *101*(1), 15–19. https://doi.org/10.1016/j.amjcard.2007.07.043

24. Arnold, S. V., Alexander, K. P., Masoudi, F. A., Ho, P. M., Xiao, L., & Spertus, J. A. (2009). The Effect of Age on Functional and Mortality Outcomes After Acute Myocardial Infarction. *Journal of the American Geriatrics Society*, *57*(2), 209–217. https://doi.org/10.1111/j.1532-5415.2008.02106.x

25. Bergman, E., Malm, D., Karlsson, J.-E., & Berterö, C. (2009). Longitudinal study of patients after myocardial infarction: Sense of coherence, quality of life, and symptoms. *Heart & Lung*, *38*(2), 129–140. https://doi.org/10.1016/j.hrtlng.2008.05.007

26. Spertus, J. A., Jones, P. G., Masoudi, F. A., Rumsfeld, J. S., & Krumholz, H. M. (2009). Factors Associated With Racial Differences in Myocardial Infarction Outcomes. *Annals of Internal Medicine*, *150*(5), 314–324. https://doi.org/10.7326/0003-4819-150-5-200903030-00007

27. Arnold, S. V., Spertus, J. A., Jones, P. G., Xiao, L., & Cohen, D. J. (2009). The impact of dyspnea on health-related quality of life in patients with coronary artery disease: Results from the PREMIER registry. *American Heart Journal*, *157*(6), 1042-1049.e1. https://doi.org/10.1016/j.ahj.2009.03.021

28. Leifheit-Limson, E. C., Reid, K. J., Kasl, S. V., Lin, H., Jones, P. G., Buchanan, D. M., Parashar, S., Peterson, P. N., Spertus, J. A., & Lichtman, J. H. (2010). The Role of Social Support in Health Status and Depressive Symptoms After Acute Myocardial Infarction: Evidence for a Stronger Relationship Among Women. *Circulation: Cardiovascular Quality and Outcomes*, *3*(2), 143–150. https://doi.org/10.1161/CIRCOUTCOMES.109.899815

29. Shin, N.-M., & Choi, J. (2010). Relationship Between Survivors’ Perceived Health Status Following Acute Coronary Syndrome and Depression Symptoms During Early Recovery Phase. *Asian Nursing Research*, *4*(4), 174–184. https://doi.org/10.1016/S1976-1317(11)60002-9

30. de Jong-Watt, W., & Sheriﬁ, I. (2011). Patient-Centred Assessment of Social Support, Health Status and Quality of Life in Patients with Acute Coronary Syndrome, *21*(2).

31. Bucholz, E. M., Rathore, S. S., Gosch, K., Schoenfeld, A., Jones, P. G., Buchanan, D. M., Spertus, J. A., & Krumholz, H. M. (2011). Effect of Living Alone on Patient Outcomes After Hospitalization for Acute Myocardial Infarction. *The American Journal of Cardiology*, *108*(7), 943–948. https://doi.org/10.1016/j.amjcard.2011.05.023

32. Dueñas, M., Ramirez, C., Arana, R., & Failde, I. (2011). Gender differences and determinants of health related quality of life in coronary patients: a follow-up study. *BMC Cardiovascular Disorders*, *11*(1), 24. https://doi.org/10.1186/1471-2261-11-24

33. Ginzburg, K., & Ein-Dor, T. (2011). Posttraumatic stress syndromes and health-related quality of life following myocardial infarction: 8-year follow-up. *General Hospital Psychiatry*, *33*(6), 565–571. https://doi.org/10.1016/j.genhosppsych.2011.08.015

34. Panthee, B., Kritpracha, C., & Chinnawong, T. (2011). Correlation between Coping Strategies and Quality of Life among Myocardial Infarction Patients in Nepal. https://doi.org/10.14710/nmjn.v1i2.976

35. Brink, E., Alsén, P., Herlitz, J., Kjellgren, K., & Cliffordson, C. (2012). General self-efficacy and health-related quality of life after myocardial infarction. *Psychology, Health & Medicine*, *17*(3), 346–355. https://doi.org/10.1080/13548506.2011.608807

36. Leifheit-Limson, E. C., Reid, K. J., Kasl, S. V., Lin, H., Buchanan, D. M., Jones, P. G., Peterson, P. N., Parashar, S., Spertus, J. A., & Lichtman, J. H. (2012). Changes in social support within the early recovery period and outcomes after acute myocardial infarction. *Journal of Psychosomatic Research*, *73*(1), 35–41. https://doi.org/10.1016/j.jpsychores.2012.04.006

37. Brink, E. (2012). Considering Both Health-Promoting and Illness-Related Factors in Assessment of Health-Related Quality of Life After Myocardial Infarction. https://doi.org/10.2174/1874434601206010090

38. Williams, L., O’Connor, R. C., Grubb, N. R., & O’Carroll, R. E. (2012). Type D personality and three-month psychosocial outcomes among patients post-myocardial infarction. *Journal of Psychosomatic Research*, *72*(6), 422–426. https://doi.org/10.1016/j.jpsychores.2012.02.007

39. Sertoz, O. O., Aydemir, O., Gulpek, D., Elbi, H., Ozenli, Y., Yilmaz, A., Ozan, E., Atesci, F., Abay, E., Semiz, M., Direk, N., Hocaoglu, C., Elyas, Z., Ozmen, M., Ozen, S., & Konuk, N. (2013). The Impact of Physical and Psychological Comorbid Conditions on the Quality of Life of Patients with Acute Myocardial Infarction: A Multi-Center, Cross-Sectional Observational Study from Turkey. *The International Journal of Psychiatry in Medicine*, *45*(2), 97–109. https://doi.org/10.2190/PM.45.2.a

40. Hosseini, S. H., Ghaemian, A., Mehdizadeh, E., & Ashraf, H. (2014). Contribution of depression and anxiety to impaired quality of life in survivors of myocardial infarction. *International Journal of Psychiatry in Clinical Practice*, *18*(3), 175–181. https://doi.org/10.3109/13651501.2014.940049

41. Bennett, K. K., Buchanan, D. M., Jones, P. G., & Spertus, J. A. (2015). Socioeconomic status, cognitive-emotional factors, and health status following myocardial infarction: testing the Reserve Capacity Model. *Journal of Behavioral Medicine*, *38*(1), 110–121. https://doi.org/10.1007/s10865-014-9583-4

42. Salazar, A., Dueñas, M., Fernandez-Palacin, F., & Failde, I. (2016). Factors related to the evolution of Health Related Quality of Life in coronary patients. A longitudinal approach using Weighted Generalized Estimating Equations with missing data. *International Journal of Cardiology*, *223*, 940–946. https://doi.org/10.1016/j.ijcard.2016.08.300

43. Dzubur, A., Mekic, M., Pesto, S., & Nabil, N. (2016). Echocardiographic Parameters as Life Quality Predictors in Patients After Myocardial Infarction Treated with Different Methods. *Medical Archives*, *70*(6), 419. https://doi.org/10.5455/medarh.2016.70.419-424

44. Mahesh, P. K. B., Gunathunga, M. W., Jayasinghe, S., Arnold, S. M., Haniffa, R., & De Silva, A. P. (2017). Pre-event quality of life and its influence on the post-event quality of life among patients with ST elevation and non-ST elevation myocardial infarctions of a premier province of Sri Lanka. *Health and Quality of Life Outcomes*, *15*(1), 154. https://doi.org/10.1186/s12955-017-0730-9

45. Kang, K., Gholizadeh, L., Han, H.-R., & Inglis, S. C. (2018). Predictors of health-related quality of life in korean patients with myocardial infarction: a longitudinal observational study. *Heart & Lung*, *47*(2), 142–148. https://doi.org/10.1016/j.hrtlng.2017.12.005

46. Xia, K., Wang, L.-F., Yang, X.-C., Jiang, H.-Y., Zhang, L.-J., Yao, D.-K., Hu, D.-Y., & Ding, R.-J. (2019). Comparing the effects of depression, anxiety, and comorbidity on quality-of-life, adverse outcomes, and medical expenditure in Chinese patients with acute coronary syndrome. *Chinese Medical Journal*, *132*(9), 1045–1052. https://doi.org/10.1097/CM9.0000000000000215

47. Kang, K., Gholizadeh, L., & Han, H.-R. (2021). Health-related Quality of Life and Its Predictors in Korean Patients with Myocardial Infarction in the Acute Phase. *Clinical Nursing Research*, *30*(2), 161–170. https://doi.org/10.1177/1054773819894692

48. Wulandari, D., Ginanjar, A. S., Purwono, U., & Purba, D. (2020). Marital Satisfaction, Anxiety, and Health-Related Quality of Life in Myocardial Infarction Patients, *12*(02).

49. Džubur, A., Lisica, D., Hodžić, E., Begić, E., Lepara, O., Fajkić, A., Gogić, E., & Ejubović, M. (2022). Relationship between depression and quality of life after myocardial infarction. *Medicinski Glasnik*, *19*(1), 0–0. https://doi.org/10.17392/1404-21

50. Rasmussen, A. A., Fridlund, B., Nielsen, K., Rasmussen, T. B., Thrysoee, L., Borregaard, B., Thorup, C. B., Berg, S. K., & Mols, R. E. (2022). Gender differences in patient-reported outcomes in patients with acute myocardial infarction. *European Journal of Cardiovascular Nursing*, *21*(8), 772–781. https://doi.org/10.1093/eurjcn/zvac022

51. Upadhyay, V., Bhandari, S. S., Rai, D. P., Dutta, S., García-Grau, P., & Vaddiparti, K. (2022). Improving depression and perceived social support enhances overall quality of life among myocardial infarction survivors: necessity for integrating mental health care into cardiac rehabilitation programs. *The Egyptian Journal of Neurology, Psychiatry and Neurosurgery*, *58*(1), 87. https://doi.org/10.1186/s41983-022-00521-6

52. Jlassi, O., Omrane, A., Ben Massoud, M., Khalfallah, T., Bouzgarrou, L., & Gamra, H. (2024). Determinants of health-related quality of life among patients with Ischemic heart disease. *Health Systems*, *13*(4), 322–331. https://doi.org/10.1080/20476965.2023.2275799

53. Sauletzhanovna, T. A., Mohammed, W. K., Ahmed, A. S., Mohammed, H. I., Al-Hili, A., Alnajar, M. J., Naser, N. S., Amr, E. F., & Mohsin, R. M. (2024). The Predictive Value of Depression and Anxiety on Protracted Cardiovascular Outcomes in Individuals with Acute Myocardial Infarction. *International Journal of Body, Mind and Culture*, (Vol 11, No(Special Issue) 2024), 64–75. https://doi.org/10.22122/ijbmc.v11isp.739

54. Füller, D., Andresen-Bundus, H., Pagonas, N., Jaehn, P., Ukena, C., Gödde, K., Holmberg, C., Ritter, O., & Sasko, B. (2025). Adverse socioeconomic factors are associated with a widening gap in one-year health-related quality of life after acute myocardial infarction. *Scientific Reports*, *15*(1), 19791. https://doi.org/10.1038/s41598-025-04604-1

55. Malm, D., Mårtensson, J., & Årestedt, K. (2025). Sense of coherence and quality of life in the recovery of women and men with myocardial infarction: a 10-year follow-up study. *European Journal of Cardiovascular Nursing*, *24*(4), 631–639. https://doi.org/10.1093/eurjcn/zvaf028
