# Supplementary material for: Determinants of Health-Related Quality of life among patients with Acute Coronary Syndromes: A systematic review
Source: Research Square preprint supplement (doi:10.21203/rs.3.rs-8829483/v1), 2026-02-10
Supplement: Supplementary file 3 [file f659fcc49882042abc727252.docx]

Supplementary material for a manuscript

**Determinants of Health-Related Quality of life among patients with Acute Coronary Syndromes: A systematic review**

In

**Quality of Life Research**

Panagiota Pelekaa*, Olympia Konstantakopouloua, Aglaia Katsiroumpaa, Maria Katharakia, Olga Siskoub, Daphne Kaitelidoua, Petros Galanisa

a National and Kapodistrian University of Athens, Department of Nursing, Athens, Greece

b University of Piraeus, Department of Tourism Studies, Athens, Greece

* Corresponding author:

[gpeleka@nurs.uoa.gr](mailto:gpeleka@nurs.uoa.gr)

**Supplementary Table S2.** Determinants of health-related quality of life among patients with acute coronary syndromes and their frequency across studies

|  | **Determinants** | **No of studies** | **References** |
| --- | --- | --- | --- |
| **Demographic factors** | | | |
| **1** | Gender | 23 | [1–23] |
| **2** | Age | 19 | [2, 5, 24–26, 8, 27, 9, 10, 28, 29, 12, 30, 16–20, 31] |
| **3** | Race (Non-Caucasian vs Caucasian) | 3 | [24, 10, 32] |
| **4** | Race (black vs whites) | 2 | [33, 34] |
| **Socioeconomic factors** | | | |
| **5** | Educational level | 6 | [13, 18, 19, 35–37] |
| **6** | Employment status | 5 | [3, 5, 6, 27] |
| **7** | Financial status | 6 | [38, 32, 39, 35–37] |
| **8** | Social support | 5 | [15, 39, 40, 31, 41] |
| **9** | Marital/partner status | 4 | [3, 6, 20] |
| **10** | Living alone | 3 | [3, 6, 42] |
| **11** | Marital satisfaction | 1 | [21] |
| **12** | Occupational qualifications | 1 | [37] |
| **13** | Insurance status (yes) | 1 | [35] |
| **14** | Reserves at the end of month | 1 | [35] |
| **15** | Number of children in charge | 1 | [43] |
| **16** | Socioeconomic status | 1 | [35] |
| **17** | Return to work | 1 | [30] |
| **Patient behaviors** | | | |
| **18** | Previous exercise behavior | 3 | [3, 6, 20] |
| **19** | Smoking | 2 | [27, 43] |
| **20** | History of alcohol or substance abuse | 1 | [10] |
| **21** | Adherence to prescribed medications | 1 | [25] |
| **Psychological factors** | | | |
| **22** | Depression | 25 | [1, 3, 44, 5, 6, 24, 45, 7, 8, 46, 27, 9, 12, 13, 32, 17–19, 35, 31, 47, 36, 22, 41, 48] |
| **23** | Anxiety | 8 | [1, 3, 44, 6, 27, 47, 21, 48] |
| **24** | Fatigue | 3 | [8, 16, 17] |
| **25** | Disturbed sleep | 1 | [16] |
| **26** | Acute stress disorder | 1 | [49] |
| **27** | Posttraumatic Stress Disorder | 1 | [49] |
| **28** | Perceived stress | 1 | [35] |
| **Personality traits and coping strategies** | | | |
| **29** | Sense of coherence | 3 | [14, 17, 50] |
| **30** | Coping strategies | 3 | [1, 7, 51] |
| **31** | Agency | 1 | [2] |
| **32** | Unmitigated communion | 1 | [2] |
| **33** | Level of masculinity | 1 | [4] |
| **34** | Understanding of illness | 1 | [31] |
| **35** | Optimism | 1 | [17] |
| **36** | Type D personality | 1 | [52] |
| **37** | Self-efficacy | 1 | [16] |
| **38** | Reserve capacity | 1 | [35] |
| **39** | Negative mood | 1 | [1] |
| **Quality of life and dimensions** | | | |
| **40** | Baseline quality of life | 6 | [13, 5, 9, 27, 12, 53] |
| **41** | Mental health | 4 | [32, 30, 16, 20] |
| **42** | Physical health | 3 | [13, 32, 35] |
| **Health System factor** | | | |
| **43** | Access to care | 1 | [13] |
| **Clinical factors and factors related to Acute Coronary Syndromes** | | | |
| **44** | Left Ventricular Ejection Fraction (LVEF) | 5 | [10, 13, 52, 54, 31] |
| **45** | Revascularization in the post discharge interim | 5 | [24, 26, 28, 30, 51] |
| **46** | Length of hospital stay | 3 | [3, 6, 43] |
| **47** | Presence of cardiac symptoms | 3 | [4, 7, 30] |
| **48** | Prior Coronary Artery Bypass Graft surgery | 3 | [5, 24, 19] |
| **49** | Severity of infarction | 3 | [3, 5, 6] |
| **50** | “ST” Elevation Myocardial Infarction vs “Non-ST” Elevation Myocardial Infarction | 2 | [53, 31] |
| **51** | Unstable angina vs Acute Myocardial Infarction | 2 | [24, 30] |
| **52** | Previous Myocardial Infarction | 2 | [9, 10] |
| **53** | Time passed after myocardial infarction | 2 | [20, 30] |
| **54** | Rehospitalization after index hospitalization for Myocardial Infarction | 2 | [25, 30] |
| **55** | Localization of the index Myocardial Infarction | 1 | [27] |
| **56** | Revascularization during initial hospitalization | 1 | [24] |
| **57** | History of Percutaneous Coronary Intervention | 1 | [25] |
| **58** | Cardiac events during follow up period | 1 | [27] |
| **59** | Subsequent Myocardial Infarction | 1 | [51] |
| **60** | Thrombolytic therapy | 2 | [10, 19] |
| **61** | Percutaneous Coronary Intervention vs medications | 1 | [54] |
| **62** | Coronary Artery Bypass Graft vs delayed Percutaneous Coronary Intervention | 1 | [54] |
| **63** | Left Ventricular Internal Diameter at end diastole (LVIDd) | 1 | [54] |
| **64** | Mitral regurtation | 1 | [54] |
| **65** | Discharge prescription of an angiotensin converting enzyme inhibitor or an angiotensin receptor blocker | 1 | [10] |
| **66** | Acute mitral regurgitation, acute ventriculoseptal defect, or tamponade | 1 | [5] |
| **67** | Q wave Myocardial Infarction | 1 | [19] |
| **68** | Dyspnea | 1 | [55] |
| **69** | Shock sustained in-hospital | 1 | [5] |
| **70** | Stress test not performed | 1 | [24] |
| **71** | Creatine kinase level | 1 | [5] |
| **Risk factors for ACS and patient comorbidities** | | | |
| **72** | Comorbidities | 6 | [4, 25, 27, 18, 47, 30] |
| **73** | Diabetes | 5 | [5, 24, 10, 36, 43] |
| **74** | Previous stroke | 4 | [24, 25, 19, 36] |
| **75** | Heart failure | 3 | [24, 25, 13] |
| **76** | History of Coronary Heart Disease | 3 | [28, 30, 20] |
| **77** | Hypertension | 2 | [18, 20] |
| **78** | Gastrointestinal problems | 1 | [27] |
| **79** | Rheumatic disease | 1 | [27] |
| **80** | Chronic Obstructive Pulmonary Disease | 1 | [24] |
| **81** | Chronic lung disease | 1 | [10] |
| **82** | Elevated serum creatinine | 1 | [24] |
| **83** | Anemia | 1 | [13] |
| **84** | History of arthritis | 1 | [24] |
| **85** | History of other heart disease | 1 | [36] |
| **86** | Hypercholesterolemia | 1 | [19] |
| **87** | Peptic ulcer disease | 1 | [24] |

**References**

1. Bogg, J., Thornton, E., & Bundred, P. (2000). Gender variability in mood, quality of life and coping following primary myocardial infarction. *Coronary Health Care*, *4*(4), 163–168. https://doi.org/10.1054/chec.2000.0095

2. Fritz, H. L. (2000). Gender-Linked Personality Traits Predict Mental Health and Functional Status Following a First Coronary Event. https://doi.org/10.1037/0278-6133.19.5.420

3. Lane, D., Carroll, D., Ring, C., Beevers, D. G., & Lip, G. Y. H. (2000). Effects of depression and anxiety on mortality and quality-of-life 4 months after myocardial infarction. *Journal of Psychosomatic Research*, *49*(4), 229–238. https://doi.org/10.1016/S0022-3999(00)00170-7

4. Radley, A., Grove, A., Wright, S., & Thurston, H. (2000). Gender-role identity after heart attack: Links with sex and subjective health status. *Psychology & Health*, *15*(1), 123–133. https://doi.org/10.1080/08870440008400293

5. Beck, C. A., Joseph, L., Bélisle, P., & Pilote, L. (2001). Predictors of quality of life 6 months and 1 year after acute myocardial infarction. *American Heart Journal*, *142*(2), 271–279. https://doi.org/10.1067/mhj.2001.116758

6. Lane, D., Carroll, D., Ring, C., Beevers, D. G., & Lip, G. Y. H. (2001). Mortality and Quality of Life 12 Months After Myocardial Infarction: Effects of Depression and Anxiety: *Psychosomatic Medicine*, *63*(2), 221–230. https://doi.org/10.1097/00006842-200103000-00005

7. Brink, E., Karlson, B. W., & Hallberg, L. R.-M. (2002). Health experiences of first-time myocardial infarction: Factors influencing women’s and men’s health-related quality of life after five months. *Psychology, Health & Medicine*, *7*(1), 5–16. https://doi.org/10.1080/13548500120101522

8. Brink, E., Grankvist, G., Karlson, B. W., & Hallberg, L. R.-M. (2005). Health-related quality of life in women and men one year after acute myocardial infarction. *Quality of Life Research*, *14*(3), 749–757. https://doi.org/10.1007/s11136-004-0785-z

9. De Jonge, P., Spijkerman, T. A., Van Den Brink, R. H. S., & Ormel, J. (2006). Depression after myocardial infarction is a risk factor for declining health related quality of life and increased disability and cardiac complaints at 12 months. *Heart*, *92*(1), 32–39. https://doi.org/10.1136/hrt.2004.059451

10. Peterson, P. N., Spertus, J. A., Magid, D. J., Masoudi, F. A., Reid, K., Hamman, R. F., & Rumsfeld, J. S. (2006). The impact of diabetes on one-year health status outcomes following acute coronary syndromes. *BMC Cardiovascular Disorders*, *6*(1), 41. https://doi.org/10.1186/1471-2261-6-41

11. Norris, C. M., Hegadoren, K., & Pilote, L. (2007). Depression Symptoms have a Greater Impact on the 1-Year Health-Related Quality of Life Outcomes of Women Post-Myocardial Infarction Compared to Men. *European Journal of Cardiovascular Nursing*, *6*(2), 92–98. https://doi.org/10.1016/j.ejcnurse.2006.05.003

12. Thombs, B. D., Ziegelstein, R. C., Stewart, D. E., Abbey, S. E., Parakh, K., & Grace, S. L. (2008). Usefulness of Persistent Symptoms of Depression to Predict Physical Health Status 12 Months After an Acute Coronary Syndrome. *The American Journal of Cardiology*, *101*(1), 15–19. https://doi.org/10.1016/j.amjcard.2007.07.043

13. Arnold, S. V., Alexander, K. P., Masoudi, F. A., Ho, P. M., Xiao, L., & Spertus, J. A. (2009). The Effect of Age on Functional and Mortality Outcomes After Acute Myocardial Infarction. *Journal of the American Geriatrics Society*, *57*(2), 209–217. https://doi.org/10.1111/j.1532-5415.2008.02106.x

14. Bergman, E., Malm, D., Karlsson, J.-E., & Berterö, C. (2009). Longitudinal study of patients after myocardial infarction: Sense of coherence, quality of life, and symptoms. *Heart & Lung*, *38*(2), 129–140. https://doi.org/10.1016/j.hrtlng.2008.05.007

15. Leifheit-Limson, E. C., Reid, K. J., Kasl, S. V., Lin, H., Jones, P. G., Buchanan, D. M., Parashar, S., Peterson, P. N., Spertus, J. A., & Lichtman, J. H. (2010). The Role of Social Support in Health Status and Depressive Symptoms After Acute Myocardial Infarction: Evidence for a Stronger Relationship Among Women. *Circulation: Cardiovascular Quality and Outcomes*, *3*(2), 143–150. https://doi.org/10.1161/CIRCOUTCOMES.109.899815

16. Brink, E., Alsén, P., Herlitz, J., Kjellgren, K., & Cliffordson, C. (2012). General self-efficacy and health-related quality of life after myocardial infarction. *Psychology, Health & Medicine*, *17*(3), 346–355. https://doi.org/10.1080/13548506.2011.608807

17. Brink, E. (2012). Considering Both Health-Promoting and Illness-Related Factors in Assessment of Health-Related Quality of Life After Myocardial Infarction. https://doi.org/10.2174/1874434601206010090

18. Sertoz, O. O., Aydemir, O., Gulpek, D., Elbi, H., Ozenli, Y., Yilmaz, A., Ozan, E., Atesci, F., Abay, E., Semiz, M., Direk, N., Hocaoglu, C., Elyas, Z., Ozmen, M., Ozen, S., & Konuk, N. (2013). The Impact of Physical and Psychological Comorbid Conditions on the Quality of Life of Patients with Acute Myocardial Infarction: A Multi-Center, Cross-Sectional Observational Study from Turkey. *The International Journal of Psychiatry in Medicine*, *45*(2), 97–109. https://doi.org/10.2190/PM.45.2.a

19. Hosseini, S. H., Ghaemian, A., Mehdizadeh, E., & Ashraf, H. (2014). Contribution of depression and anxiety to impaired quality of life in survivors of myocardial infarction. *International Journal of Psychiatry in Clinical Practice*, *18*(3), 175–181. https://doi.org/10.3109/13651501.2014.940049

20. Salazar, A., Dueñas, M., Fernandez-Palacin, F., & Failde, I. (2016). Factors related to the evolution of Health Related Quality of Life in coronary patients. A longitudinal approach using Weighted Generalized Estimating Equations with missing data. *International Journal of Cardiology*, *223*, 940–946. https://doi.org/10.1016/j.ijcard.2016.08.300

21. Wulandari, D., Ginanjar, A. S., Purwono, U., & Purba, D. (2020). Marital Satisfaction, Anxiety, and Health-Related Quality of Life in Myocardial Infarction Patients, *12*(02).

22. Džubur, A., Lisica, D., Hodžić, E., Begić, E., Lepara, O., Fajkić, A., Gogić, E., & Ejubović, M. (2022). Relationship between depression and quality of life after myocardial infarction. *Medicinski Glasnik*, *19*(1), 0–0. https://doi.org/10.17392/1404-21

23. Rasmussen, A. A., Fridlund, B., Nielsen, K., Rasmussen, T. B., Thrysoee, L., Borregaard, B., Thorup, C. B., Berg, S. K., & Mols, R. E. (2022). Gender differences in patient-reported outcomes in patients with acute myocardial infarction. *European Journal of Cardiovascular Nursing*, *21*(8), 772–781. https://doi.org/10.1093/eurjcn/zvac022

24. Rumsfeld, J. S., Magid, D. J., Plomondon, M. E., O’Brien, M. M., Spertus, J. A., Every, N. R., & Sales, A. E. (2001). Predictors of quality of life following acute coronary syndromes. *The American Journal of Cardiology*, *88*(7), 781–784. https://doi.org/10.1016/S0002-9149(01)01852-5

25. McBurney, C. R., Eagle, K. A., Kline‐Rogers, E. M., Cooper, J. V., Mani, O. C. M., Smith, D. E., & Erickson, S. R. (2002). Health‐Related Quality of Life in Patients 7 Months After a Myocardial Infarction: Factors Affecting the Short Form‐12. *Pharmacotherapy: The Journal of Human Pharmacology and Drug Therapy*, *22*(12), 1616–1622. https://doi.org/10.1592/phco.22.17.1616.34121

26. Bengtsson, I., Hagman, M., Währborg, P., & Wedel, H. (2004). Lasting impact on health-related quality of life after a first myocardial infarction. *International Journal of Cardiology*, *97*(3), 509–516. https://doi.org/10.1016/j.ijcard.2003.12.011

27. Dickens, C. M., McGowan, L., Percival, C., Tomenson, B., Cotter, L., Heagerty, A., & Creed, F. H. (2006). Contribution of depression and anxiety to impaired health-related quality of life following first myocardial infarction. *British Journal of Psychiatry*, *189*(4), 367–372. https://doi.org/10.1192/bjp.bp.105.018234

28. Failde, I. I., & Soto, M. M. (2006). Changes in health related quality of life 3 months after an acute coronary syndrome. *BMC Public Health*, *6*(1), 18. https://doi.org/10.1186/1471-2458-6-18

29. Ho, P. M., Eng, M. H., Rumsfeld, J. S., Spertus, J. A., Peterson, P. N., Jones, P. G., Peterson, E. D., Alexander, K. P., Havranek, E. P., Krumholz, H. M., & Masoudi, F. A. (2008). The influence of age on health status outcomes after acute myocardial infarction. *American Heart Journal*, *155*(5), 855–861. https://doi.org/10.1016/j.ahj.2007.11.032

30. Dueñas, M., Ramirez, C., Arana, R., & Failde, I. (2011). Gender differences and determinants of health related quality of life in coronary patients: a follow-up study. *BMC Cardiovascular Disorders*, *11*(1), 24. https://doi.org/10.1186/1471-2261-11-24

31. Kang, K., Gholizadeh, L., Han, H.-R., & Inglis, S. C. (2018). Predictors of health-related quality of life in korean patients with myocardial infarction: a longitudinal observational study. *Heart & Lung*, *47*(2), 142–148. https://doi.org/10.1016/j.hrtlng.2017.12.005

32. Shin, N.-M., & Choi, J. (2010). Relationship Between Survivors’ Perceived Health Status Following Acute Coronary Syndrome and Depression Symptoms During Early Recovery Phase. *Asian Nursing Research*, *4*(4), 174–184. https://doi.org/10.1016/S1976-1317(11)60002-9

33. Spertus, J., Safley, D., Garg, M., Jones, P., & Peterson, E. D. (2005). The Influence of Race on Health Status Outcomes One Year After an Acute Coronary Syndrome. *Journal of the American College of Cardiology*, *46*(10), 1838–1844. https://doi.org/10.1016/j.jacc.2005.05.092

34. Spertus, J. A., Jones, P. G., Masoudi, F. A., Rumsfeld, J. S., & Krumholz, H. M. (2009). Factors Associated With Racial Differences in Myocardial Infarction Outcomes. *Annals of Internal Medicine*, *150*(5), 314–324. https://doi.org/10.7326/0003-4819-150-5-200903030-00007

35. Bennett, K. K., Buchanan, D. M., Jones, P. G., & Spertus, J. A. (2015). Socioeconomic status, cognitive-emotional factors, and health status following myocardial infarction: testing the Reserve Capacity Model. *Journal of Behavioral Medicine*, *38*(1), 110–121. https://doi.org/10.1007/s10865-014-9583-4

36. Kang, K., Gholizadeh, L., & Han, H.-R. (2021). Health-related Quality of Life and Its Predictors in Korean Patients with Myocardial Infarction in the Acute Phase. *Clinical Nursing Research*, *30*(2), 161–170. https://doi.org/10.1177/1054773819894692

37. Füller, D., Andresen-Bundus, H., Pagonas, N., Jaehn, P., Ukena, C., Gödde, K., Holmberg, C., Ritter, O., & Sasko, B. (2025). Adverse socioeconomic factors are associated with a widening gap in one-year health-related quality of life after acute myocardial infarction. *Scientific Reports*, *15*(1), 19791. https://doi.org/10.1038/s41598-025-04604-1

38. Rahimi, A. R., Spertus, J. A., Reid, K. J., Bernheim, S. M., & Krumholz, H. M. (2007). Financial Barriers to Health Care and Outcomes After Acute Myocardial Infarction. *JAMA*, *297*(10), 1063. https://doi.org/10.1001/jama.297.10.1063

39. de Jong-Watt, W., & Sheriﬁ, I. (2011). Patient-Centred Assessment of Social Support, Health Status and Quality of Life in Patients with Acute Coronary Syndrome, *21*(2).

40. Leifheit-Limson, E. C., Reid, K. J., Kasl, S. V., Lin, H., Buchanan, D. M., Jones, P. G., Peterson, P. N., Parashar, S., Spertus, J. A., & Lichtman, J. H. (2012). Changes in social support within the early recovery period and outcomes after acute myocardial infarction. *Journal of Psychosomatic Research*, *73*(1), 35–41. https://doi.org/10.1016/j.jpsychores.2012.04.006

41. Upadhyay, V., Bhandari, S. S., Rai, D. P., Dutta, S., García-Grau, P., & Vaddiparti, K. (2022). Improving depression and perceived social support enhances overall quality of life among myocardial infarction survivors: necessity for integrating mental health care into cardiac rehabilitation programs. *The Egyptian Journal of Neurology, Psychiatry and Neurosurgery*, *58*(1), 87. https://doi.org/10.1186/s41983-022-00521-6

42. Bucholz, E. M., Rathore, S. S., Gosch, K., Schoenfeld, A., Jones, P. G., Buchanan, D. M., Spertus, J. A., & Krumholz, H. M. (2011). Effect of Living Alone on Patient Outcomes After Hospitalization for Acute Myocardial Infarction. *The American Journal of Cardiology*, *108*(7), 943–948. https://doi.org/10.1016/j.amjcard.2011.05.023

43. Jlassi, O., Omrane, A., Ben Massoud, M., Khalfallah, T., Bouzgarrou, L., & Gamra, H. (2024). Determinants of health-related quality of life among patients with Ischemic heart disease. *Health Systems*, *13*(4), 322–331. https://doi.org/10.1080/20476965.2023.2275799

44. Mayou, R. A., Gill, D., Thompson, D. R., Day, A., Hicks, N., Volmink, J., & Neil, A. (2000). Depression and Anxiety As Predictors of Outcome After Myocardial Infarction: *Psychosomatic Medicine*, *62*(2), 212–219. https://doi.org/10.1097/00006842-200003000-00011

45. Rumsfeld, J. S., Magid, D. J., Plomondon, M. E., Sales, A. E., Grunwald, G. K., Every, N. R., & Spertus, J. A. (2003). History of depression, angina, and quality of life after acute coronary syndromes. *American Heart Journal*, *145*(3), 493–499. https://doi.org/10.1067/mhj.2003.177

46. Fauerbach, J. A., Bush, D. E., Thombs, B. D., McCann, U. D., Fogel, J., & Ziegelstein, R. C. (2005). Depression Following Acute Myocardial Infarction: A Prospective Relationship With Ongoing Health and Function. *Psychosomatics*, *46*(4), 355–361. https://doi.org/10.1176/appi.psy.46.4.355

47. Xia, K., Wang, L.-F., Yang, X.-C., Jiang, H.-Y., Zhang, L.-J., Yao, D.-K., Hu, D.-Y., & Ding, R.-J. (2019). Comparing the effects of depression, anxiety, and comorbidity on quality-of-life, adverse outcomes, and medical expenditure in Chinese patients with acute coronary syndrome. *Chinese Medical Journal*, *132*(9), 1045–1052. https://doi.org/10.1097/CM9.0000000000000215

48. Sauletzhanovna, T. A., Mohammed, W. K., Ahmed, A. S., Mohammed, H. I., Al-Hili, A., Alnajar, M. J., Naser, N. S., Amr, E. F., & Mohsin, R. M. (2024). The Predictive Value of Depression and Anxiety on Protracted Cardiovascular Outcomes in Individuals with Acute Myocardial Infarction. *International Journal of Body, Mind and Culture*, (Vol 11, No(Special Issue) 2024), 64–75. https://doi.org/10.22122/ijbmc.v11isp.739

49. Ginzburg, K., & Ein-Dor, T. (2011). Posttraumatic stress syndromes and health-related quality of life following myocardial infarction: 8-year follow-up. *General Hospital Psychiatry*, *33*(6), 565–571. https://doi.org/10.1016/j.genhosppsych.2011.08.015

50. Malm, D., Mårtensson, J., & Årestedt, K. (2025). Sense of coherence and quality of life in the recovery of women and men with myocardial infarction: a 10-year follow-up study. *European Journal of Cardiovascular Nursing*, *24*(4), 631–639. https://doi.org/10.1093/eurjcn/zvaf028

51. Panthee, B., Kritpracha, C., & Chinnawong, T. (2011). Correlation between Coping Strategies and Quality of Life among Myocardial Infarction Patients in Nepal. https://doi.org/10.14710/nmjn.v1i2.976

52. Williams, L., O’Connor, R. C., Grubb, N. R., & O’Carroll, R. E. (2012). Type D personality and three-month psychosocial outcomes among patients post-myocardial infarction. *Journal of Psychosomatic Research*, *72*(6), 422–426. https://doi.org/10.1016/j.jpsychores.2012.02.007

53. Mahesh, P. K. B., Gunathunga, M. W., Jayasinghe, S., Arnold, S. M., Haniffa, R., & De Silva, A. P. (2017). Pre-event quality of life and its influence on the post-event quality of life among patients with ST elevation and non-ST elevation myocardial infarctions of a premier province of Sri Lanka. *Health and Quality of Life Outcomes*, *15*(1), 154. https://doi.org/10.1186/s12955-017-0730-9

54. Dzubur, A., Mekic, M., Pesto, S., & Nabil, N. (2016). Echocardiographic Parameters as Life Quality Predictors in Patients After Myocardial Infarction Treated with Different Methods. *Medical Archives*, *70*(6), 419. https://doi.org/10.5455/medarh.2016.70.419-424

55. Arnold, S. V., Spertus, J. A., Jones, P. G., Xiao, L., & Cohen, D. J. (2009). The impact of dyspnea on health-related quality of life in patients with coronary artery disease: Results from the PREMIER registry. *American Heart Journal*, *157*(6), 1042-1049.e1. https://doi.org/10.1016/j.ahj.2009.03.021
